## **Genetic basis and adaptive implications of temperature-dependent and temperature-independent effects of drought on chickpea phenology**

Yongle Li<sup>1</sup>, Lachlan Lake<sup>1,2</sup>, Yashvir S. Chauhan<sup>3</sup>, Julian Taylor<sup>1</sup>, Victor O. Sadras<sup>1,2\*</sup>

<sup>1</sup> School of Agriculture, Food and Wine, The University of Adelaide

<sup>2</sup> South Australian Research and Development Institute, Australia

<sup>3</sup> Department of Agriculture and Fisheries, Kingaroy, Australia

\* corresponding author

YL: [yongle.li@adelaide.edu.au](mailto:yongle.li@adelaide.edu.au)

LL: [lachlan.lacke@sa.gov.au](mailto:lachlan.lacke@sa.gov.au)

YSC: [yash.chauhan@daf.qld.gov.au](mailto:yash.chauhan@daf.qld.gov.au)

JT: [julian.taylor@adelaide.edu.au](mailto:julian.taylor@adelaide.edu.au)

VS: [victor.sadras@sa.gov.au](mailto:victor.sadras@sa.gov.au)

**Running title:** drought effect of phenological development

**Word count** (Introduction to Acknowledgements, excluding Methods): 4644

7 Figures, 2 Tables

## 1 Highlight

2 Predictive and genetic models that overlook drought effects on phenology can return biased predictions of  
3 adaptation to future climates. Here we study the genetic causes and adaptive consequences of hastened  
4 flowering under drought.

5

## 6 Abstract

7 Water deficit often hastens flowering of pulses partially because droughted plants are hotter.

8 Separating temperature-independent and temperature-dependent effects of drought is important to  
9 understand, model and manipulate phenology genetically and agronomically.

10 We define a new trait, *drought effect on phenology* (*DEP* = difference in flowering time between  
11 irrigated and rainfed crops), and use  $F_{ST}$  genome scan to probe for genomic regions under  
12 selection for this trait. Genomic regions overlapping for early- and late-sown crops would associate  
13 with temperature-independent effects and non-overlapping genomic regions would associate with  
14 temperature-dependent effects.

15 Time to flowering shortened with increasing water stress quantified with carbon isotope  
16 composition. Genomic regions on chromosomes 4, 5, 7 and 8 were under selection for *DEP*. An  
17 overlapping region for early and late sowing on chromosome 8 revealed a temperature-  
18 independent effect with four candidate genes: *BAM1*, *BAM2*, *HSL2* and *ANT*. The non-overlapping  
19 regions included six candidate genes: *EMF1*, *EMF2*, *BRC1/TCP18*, *BZR1*, *NPGR1* and *ERF1*.

20 Modelling to assess *DEP* adaptive value showed it reduces the likelihood of drought and heat  
21 stress at the expense of cold risk. Accounting for *DEP* would improve phenology models to predict  
22 adaptation to future climates and breeding against the combined risks of drought, heat, and cold  
23 stress.

24

25 **Key words:** carbon isotope, climate change, development, drought, flowering, genome, heat,  
26 phenotype, temperature, trade-off

## 27 Introduction

28 Phenological shifts are the most conspicuous biological effects of global change, and the relative  
29 phenology of plants, herbivores and predators is central to the assemblage of trophic webs in natural  
30 and agricultural systems (Kankaanpää *et al.*, 2020; Levine *et al.*, 2002; Otegui *et al.*, 2021; Parmesan,  
31 2006; Richardson *et al.*, 2013). Darwin (1859) observed “...very trifling changes, such as a little more or  
32 less water at some particular period of growth, will determine whether or not the plant sets a grain...”.  
33 This notion of a critical developmental period for seed production is central to plant physiology and  
34 agriculture, as farmers pair genotype and sowing time to manipulate crop phenology against the risks of  
35 frost, heat, drought, herbivory, and disease (Berger *et al.*, 2006; Berger *et al.*, 2004; Hunt *et al.*, 2019;  
36 Lake *et al.*, 2021; Otegui *et al.*, 2021).

37 Temperature and photoperiod modulate the transition from the vegetative to reproductive stage and are  
38 at the core of predictive models (Lake *et al.*, 2021; Mauney, 1963; Patrick and Stoddard, 2010;  
39 Summerfield *et al.*, 1985; Wallach *et al.*, 2021; Zheng *et al.*, 2013). Fragmented empirical evidence  
40 shows that water deficit often hastens flowering in temperate grain legumes including chickpea (*Cicer*  
41 *arietinum*,  $2n = 2x = 16$ ), the focus of this study (Anbazhagan *et al.*, 2015; Fang *et al.*, 2011; Johansen  
42 *et al.*, 1994; Lizarazo *et al.*, 2017; Singh, 1991; Thomas *et al.*, 2004). Genotypic variation in this  
43 response is largely unexplored. Likewise, the adaptive and agronomic value of hastened flowering in  
44 response to water deficit is unknown but is expected to vary with soil and climate driving the patterns of  
45 supply and demand of water (Jordan and Miller, 1980; Schwinning and Ehleringer, 2001; Tardieu,  
46 2012). Few *ad-hoc* models capture the effect of drought on flowering time (Chauhan *et al.*, 2019;  
47 Lizarazo *et al.*, 2017; McMaster *et al.*, 2011) but mainstream crop models commonly used in climate  
48 change predictions do not (Wallach *et al.*, 2021). Overlooking the effect of plant water status on  
49 phenology can therefore bias predictions of crop adaptation to future climates.

50 In contrast to the hastening of flowering in droughted chickpea (Chauhan *et al.*, 2019; Fang *et al.*,  
51 2011), water deficit delayed time to first flower in Tunisian populations of burr medic (*Medicago*  
52 *polymorpha*) from wet (664 mm annual rainfall) and intermediate (345 mm yr<sup>-1</sup>) environments, with no  
53 effect on fast-developing populations from dry environments (173 mm yr<sup>-1</sup>) (Yousfi *et al.*, 2015). The  
54 discrepancy between drought hastening or delaying development can be related to species, ecotype,  
55 and other factors such as the intensity of stress and interactions between water stress and  
56 temperature. For example, wheat (*Triticum aestivum*) phenological development responds non-linearly  
57 to plant water status, with mild water stress shortening and severe stress extending the time from floral  
58 initiation to anthesis (Angus and Moncur, 1977). In a factorial combining water regime and sowing time,

59 water deficit hastened the flowering of mungbean (*Vigna radiata*) in early but not in late sowing,  
60 highlighting the interaction of water and temperature in modulating development (Thomas *et al.*, 2004).  
61 Owing to the shift from latent heat to sensible heat, crop canopies are hotter under drought (Jones,  
62 1992). Hence, hotter plant tissue may partially account for the effect of water deficit on phenology, but  
63 temperature-independent effects cannot be disregarded (McMaster *et al.*, 2011). Separating  
64 temperature-dependent and temperature-independent effects of water deficit is important to  
65 understand, model and manipulate plant phenology genetically and agronomically.

66 Natural and agronomic selection may leave fingerprints in the genome, such as an extended genomic  
67 region where selection hitchhiking reduces diversity (Nielsen *et al.*, 2005). The small genome of  
68 chickpea allows for whole-genome resequencing of contrasting genotypes to identify genomic regions  
69 under selection for agronomic traits (Li *et al.*, 2017; Sadras *et al.*, 2016).  $F_{ST}$  genome scan, where  $F_{ST}$  is  
70 the fixation index (Wright, 1950), uses a large number of molecular markers to scan regions with  
71 extreme genetic differentiation between diverging populations (Fumagalli *et al.*, 2013; Holsinger and  
72 Weir, 2009).  $F_{ST}$  genome-scan is based on neutral theory, assuming that polymorphisms are selectively  
73 neutral and random genetic drift is the main driver of allele frequencies in populations without selection  
74 (Booker *et al.*, 2020). This approach to detect selection signals in small samples has been insightful in  
75 ecological and evolutionary settings (Barr *et al.*, 2021; Van Bocxlaer, 2017), for crops including rice  
76 (*Oryza sativa*), wheat and chickpea (Jordan *et al.*, 2015; Li *et al.*, 2017; Sadras *et al.*, 2016; Xu *et al.*,  
77 2012), and for crop pests such as the soybean aphid, *Aphis glycines* (Coates *et al.*, 2020). The  
78 reliability of  $F_{ST}$  genome scan is particularly apparent in a comparison between  $F_{ST}$  genome scan and  
79 genome-wide association (GWAS), with both returning a common 100 kb region (AB4.1) on  
80 chromosome 4 associated with Ascochyta blight resistance in chickpea (Li *et al.*, 2017).

81  
82 Here we define a new trait, *drought effect on phenology* ( $DEP$  = difference in flowering time between  
83 irrigated and rainfed crops), to test three hypotheses in a study combining field experiments,  $F_{ST}$   
84 genome scan, and modelling. First, time to flowering is shortened in proportion to plant water deficit,  
85 and this response is genotype-dependent. Second, the effect of drought on phenology involves genes  
86 associated with both temperature-independent and temperature-dependent components. Genomic  
87 regions under selection for  $DEP$  that are common to early- and late-sown crops would support  
88 temperature-independent effects while non-common genomic regions would indicate temperature-  
89 dependent effects. Third, drought modulation of phenology drives a site-dependent reduction in drought  
90 and heat stress at the expense of cold stress; this hypothesis was tested with modelling in a north-  
91 south transect with varying soils, rainfall and thermal regimes in eastern Australia.

## 92 **Methods**

### 93 *Phenotyping phenology, carbon isotope composition and seed size in the field*

94 A field experiment was established on a calcic luvisol (Isbell, 1996) at Roseworthy, South Australia (34°  
95 52' S, 138° 69'E) that combined factorially 20 genotypes (Table 1), two water regimes (dry, rainfed; wet,  
96 sprinkler irrigated), and two sowing times (early, early June; late, early-mid July). The experiment was  
97 repeated twice over successive seasons. Treatments were laid out in a split-split-plot design with three  
98 replicates, where sowing time was assigned to the main plot, water regime to the sub-plot, and  
99 genotypes randomised within each plot. Each plot comprised 6 rows, 0.24 m apart, 5-m long. Further  
100 details of the experiment are in Sadras et al. (2016).

101

102 To avoid bias associated with border effects, all measurements were made in the center rows  
103 (Rebetzke *et al.*, 2014). We scored phenology weekly to establish the time to 50% of plants at  
104 beginning of flowering and calculated thermal time from sowing to flowering using a base temperature  
105 of 0 °C (Berger *et al.*, 2006; Berger *et al.*, 2004). To quantify crop water status, we measured carbon  
106 isotope composition ( $\delta^{13}\text{C}$ ) at peak biomass, shortly after flowering. This trait integrates crop water  
107 status over the growing period until sampling time and is robust in relation to environmental conditions  
108 – radiation, wind speed, temperature, vapour pressure deficit (Condon *et al.*, 2002), unlike traits such  
109 as stomatal conductance, leaf water potential or canopy temperature that vary with conditions at  
110 sampling time. Ten shoots per replicate were sampled and dried at 70 °C for 48 h; subsamples were  
111 ground and analysed for C isotope composition using a Europa 20-20 stable isotope ratio mass  
112 spectrometer with an ANCA-SL (Automated Nitrogen Carbon Analysis for Solids and Liquids)  
113 preparation system. In a batch of samples, after every eighth sample a test and a reference (Pee Dee  
114 Belemnite) were determined and used to correct for any drift or carryover in the instrument. Carbon  
115 isotope composition  $\delta^{13}\text{C}$  was calculated as (Condon et al., 2002):

116

$$117 \quad \delta^{13}\text{C} (\text{‰}) = \left( \frac{R_p}{R_r} - 1 \right) \times 1000 \quad \text{eq. (1)}$$

118

119 where R is the  $^{13}\text{C}/^{12}\text{C}$  ratio and subscripts indicate plant (p) and reference (r).

120

121 To probe for associations between phenology and seed weight, as expected from pleiotropic effects  
122 (Hovav *et al.*, 2003; Kumar and Abbo, 2001), we measured average seed weight at maturity after  
123 drying and threshing 2-m<sup>2</sup> plant samples.

124 *Statistical analysis of crop traits*

125 Time from sowing to flowering, carbon isotope composition and seed weight were analysed with a  
126 linear mixed model (LMM) where the fixed component consisted of the crossed factor combinations of  
127 genotype, sowing time, water regime and season. This ensured the LMM fixed effects included main  
128 effects for each of the factors as well as the full complement of second, third and fourth order  
129 interactions. Additional sources of variation associated with aspects of the field design such as  
130 replicates, or non-linear trends across the rows or ranges of the experiment, were modelled using  
131 random effects. Due to the distinct sowing times within each season, and the potential for traits to vary  
132 significantly between water regimes, we partitioned the model residuals of the LMM to ensure a  
133 separate residual variance was specified for each combination of season by sowing time by water  
134 regime. From this complete model, Wald ANOVA tables were extracted for summary. To appropriately  
135 compare genotypes between water regimes, BLUEs for genotype by water regime by sowing time, and  
136 averaged over season, were predicted from the LMM.

137 Generalised broad-sense heritability was calculated for all traits using the method by Cullis et al.  
138 (2006). This involved re-fitting the LMM with the genotype factor as a random effect and leaving other  
139 terms unchanged in the LMM specification. Heritabilities are then considered to be averaged over water  
140 regimes, sowing times and seasons.

141 To explore associations between variables, we fitted least square regression (Model I) when error in  $x$   
142 was negligible in comparison to error in  $y$  and reduced maximum axis regression (RMA, Model II) to  
143 account for error in both  $x$  and  $y$  (Niklas, 1994). For both ANOVA and regressions, we present  $p$  as  
144 continuous values, avoiding arbitrary  $p$  thresholds for significance (Wasserstein *et al.*, 2019).

145 *Drought effect on phenology (DEP)* was calculated in two ways, with difference- and residual-based  
146 approaches. First, we calculated *DEP* as the *difference* in flowering time between the dry and wet  
147 treatments. A reduced LMM was fitted using the above model, with the water regime treatment omitted.  
148 From this LMM, BLUEs for the genotypes within each sowing time were predicted. The second  
149 approach uses the BLUEs of flowering time by genotype, sowing time and water regime extracted from  
150 the full fitted LMM defined above. Within each sowing time, BLUEs of flowering time for the wet  
151 treatment were regressed against the BLUEs of flowering time for the dry treatment, and the *residuals*  
152 from the RMA regressions were taken as a proxy for *DEP* (Erena *et al.*, 2021; McDonald *et al.*, 2018).  
153 *DEP* calculated as differences correlated closely with *DEP* calculated as residuals ( $r = 0.93$  for first  
154 sowing,  $r = 0.96$  for second sowing,  $p < 0.0001$  for both; Supplementary Figure 1). Hereafter, we report  
155 difference-based *DEP* for clearer biological interpretation; for example, early sown Genesis Kalkee

156 returned a difference-based  $DEP = 219$  °Cd, which means drought hastened flowering by 219 °Cd in  
157 relation to well-watered crops.

158

#### 159 *DNA sequencing and $F_{ST}$ genome scan*

160 DNA extraction and sequencing have been described previously (Sadras *et al.*, 2016). Briefly, we  
161 extracted DNA of the 20 chickpea genotypes from young leaves using Qiagen DNeasy Plant Mini Kit.  
162 TruSeq libraries were constructed for each genotype with an insert size of 500 base pairs and  
163 sequenced using Illumina HiSeq 2000 platform. Pair-end reads (100 bp) were trimmed and mapped to  
164 the reference genome 2.6.3 (<http://cicer.info>) using SOAP2 (Li *et al.*, 2009). To perform  $F_{ST}$  genome  
165 scan, the BAM files of the top six and bottom six genotypes based on the adjusted entry means of  $DEP$   
166 were selected as contrasting populations for  $F_{ST}$  estimation.  $F_{ST}$  of the two contrasting populations were  
167 estimated using software ngsTools and ANGSD (Fumagalli *et al.*, 2013; Fumagalli *et al.*, 2014;  
168 Korneliussen *et al.*, 2014).  $F_{ST}$  is a measurement of genetic differentiation between populations, with  
169 larger  $F_{ST}$  indicative of larger divergence between the populations. The whole genome was scanned for  
170 each 100 kb window (non-overlapping) to find regions with extreme  $F_{ST}$  (compared with the adjacent  
171 regions) as an indicator of regions under selection. The assumption is that if a region is under selection,  
172 the pattern of genetic differentiation between populations may change, i.e. alleles may be fixed in a  
173 particular population. Genomic regions with the top 0.1%  $F_{ST}$  were considered to be under selection  
174 (Sadras *et al.*, 2016).

175

#### 176 *Modelling the adaptive value of drought effect on phenology*

177 Current models reliably predict phenology but not yield of pulses particularly because algorithms are  
178 lacking that relate yield and extreme temperatures (Lake *et al.*, 2021). Thus, to test our third  
179 hypothesis, we modelled the phenology of two contrasting genotypes – responsive vs. unresponsive to  
180 water deficit – to quantify the phenology-driven differences in water stress and temperature in the  
181 critical period from flowering to 200 °Cd after flowering (Lake and Sadras, 2014). The expectation is  
182 reduced water stress and lower temperature during the critical period of the responsive genotype in  
183 relation to its unresponsive counterpart (Fig. 1a). We used APSIM (Classic version 7.10) to simulate  
184 flowering time and the daily water stress index,  $WSI$ . The  $WSI$  is the ratio between the potential water  
185 supply, which depends on the volume and wetness of soil explored by roots, and the water demand of  
186 the canopy, which is a function of radiation, ambient temperature and humidity (Chenu *et al.*, 2011).



187 The *WSI* ranges from 1 (no stress) to 0 (no growth) (Fig. 1a). APSIM is a widely used crop simulator  
188 framework that has been extensively validated for multiple crops and environments in Australia and  
189 elsewhere (Holzworth *et al.*, 2014; Keating *et al.*, 2003). Tests of the model's ability to simulate  
190 phenology and *WSI* are particularly relevant for our study. Modelled chickpea flowering time as a  
191 function of temperature, daylength and soil water content correlated closely with measured flowering  
192 time in eastern Australia (Chauhan *et al.*, 2019). The *WSI* has been extensively used for spatial  
193 characterisation of drought in many crop species and environments (Chenu, 2015). For chickpea in  
194 Australia, the modelled *WSI* is biologically and agronomically robust as it defines drought types that  
195 correlate with seed yield (Chauhan *et al.*, 2017; Lake *et al.*, 2016).

196 We modelled two "isolines", responsive and non-responsive to drought, using the same genetic  
197 parameters (Supplementary Table 1) except for phenological development of the responsive genotype  
198 for which developmental time was scaled with the algorithms developed and tested by Chauhan *et al.*  
199 (2019) to capture the drought effect on phenology. The two genotypes were compared in a factorial  
200 combining 11 locations in eastern Australia (Figure 1b), 65 years from 1957, five sowing times (at  
201 fortnightly intervals from 14<sup>th</sup> of May to 14<sup>th</sup> of July) and two initial soil water contents (reset to field  
202 capacity or 50% field capacity on the 1<sup>st</sup> of December of each preceding year). At sowing, a 20 mm  
203 irrigation was applied to ensure establishment. Climate data were sourced from Queensland  
204 Government data base<sup>1</sup>. Photothermal and rainfall regimes of these environments have been described  
205 in detail (Chauhan *et al.*, 2017; Chauhan *et al.*, 2008; Rodriguez and Sadras, 2007; Sadras and  
206 Rodriguez, 2007). Soil properties were obtained from the APSOIL database ([www.apsim.info](http://www.apsim.info)). Out of the  
207 7150 combinations in this factorial, 109 were failed crops as defined in Chauhan *et al.* (2017); the  
208 analysis thus focused on 7041 combinations. Using these data, the responsive and unresponsive  
209 genotypes were compared in two analyses. First, we calculated frequency distributions of flowering  
210 time, and *WSI*, maximum, minimum and mean temperature in the critical period. Second, for *WSI* and  
211 temperatures, one-to-one scatterplots were drawn against the null hypothesis of no difference between  
212 genotypes represented by the  $y = x$  line; deviations from  $y = x$  line were analysed with ANOVA to  
213 account for the effect of location, time of sowing and climate change. To assess the variation in the  
214 adaptive value of *DEP* with climate change, we used the updated World Meteorological Organisation  
215 climatological standard (Hulme, 2020); data were partitioned in 'present-day' climate, from 1991, and  
216 'historic' climate before 1991.

217

---

<sup>1</sup> <https://www.longpaddock.qld.gov.au/silo/point-data/>



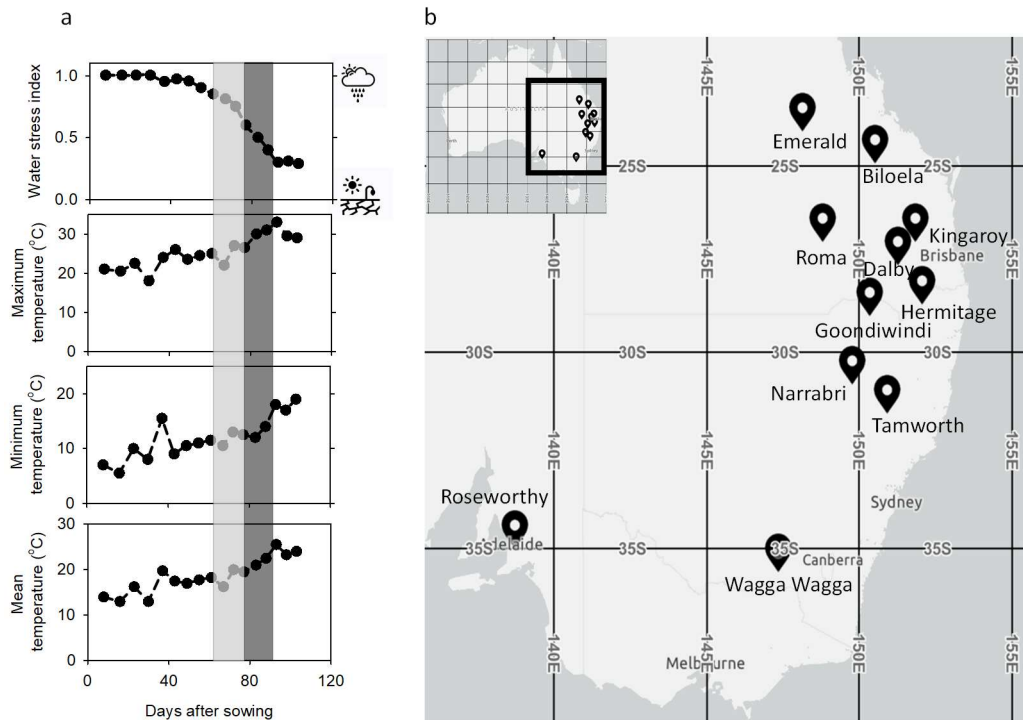

218

219

Figure 1. (a) Illustration of the dynamics of water stress index, maximum, minimum and mean temperature during the growing season of chickpea in relation to the critical period for a genotype responsive to water deficit (light grey) and an unresponsive genotype (dark grey). The water stress index ranges from 1 (no stress) to 0 (no growth). (b) Transect of locations in eastern Australia, from Emerald to Wagga Wagga, used to model the phenology, water stress index and temperature during the critical period; Roseworthy, the experimental site, was also included in the simulations.

220

## 221 Results

### 222 *Photothermal and water regimes caused large variation in crop water status and phenology*

223 Figure 2 summarises photothermal and water regimes. Solar radiation increased from 10.3-10.6 MJ m<sup>-2</sup>  
224 for early sowing to 12.2-13.6 MJ m<sup>-2</sup> with late sowing, maximum temperature from 16.8 to 18.6-19.9 °C  
225 and vapour pressure deficit from 0.70-0.73 kPa to 0.81-0.96 kPa (Fig. 1a).

226 Carbon isotope composition correlated with the ratio of water supply : demand (Fig. 2b). Carbon isotope  
227 composition indicated more severe water deficit in the dry than in the wet treatment and in late  
228 compared to early sowing (Fig. 2c, Supplementary Table 2). The difference in  $\delta^{13}\text{C}$  between wet and  
229 dry regimes was slightly smaller in late than in early-sown crops (Fig. 2c; Supplementary Table 2: water  
230 regime x sowing time interaction,  $p = 0.06$ ).

231 Daylength varied from 10.8 to 11.0 h. (Fig. 2a). Detailed studies indicate this small variation in  
 232 daylength can be regarded as a minor influence on phenology (Daba *et al.*, 2016b; Hovav *et al.*, 2003).  
 233 Across genotypes, time from sowing to flowering ranged from 69 to 108 d or 877 to 1190 °Cd. Thermal  
 234 time to flowering was unrelated to daylength, and aligned with  $\delta^{13}\text{C}$  ( $r = -0.99$ ,  $p = 0.003$ ). Hence,  
 235 variation in phenology with sowing time was mostly attributable to temperature and water regime, as  
 236 discussed below.

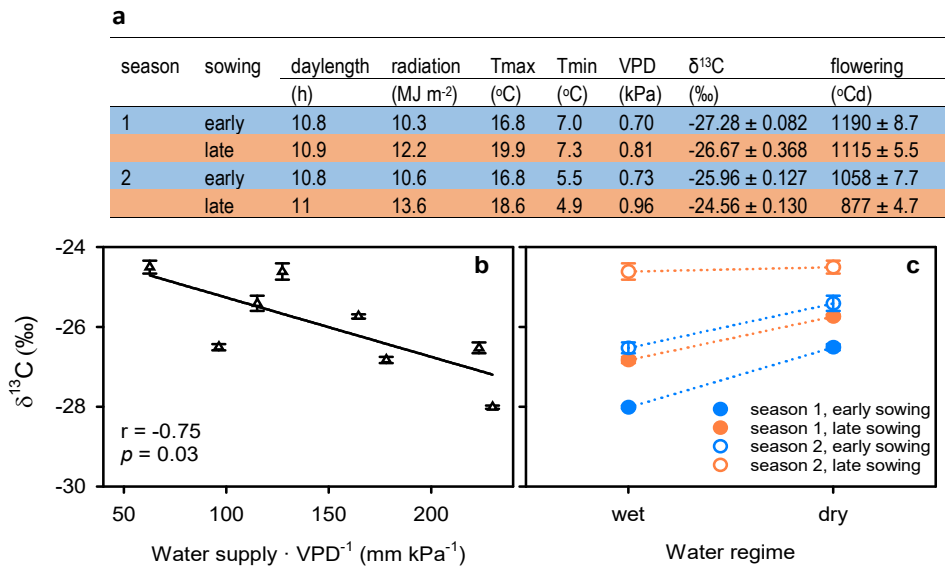

Figure 2. Photothermal and water regimes for chickpea crops associated with experimental sources of variation. (a) Daylength, solar radiation, maximum temperature (Tmax), minimum temperature (Tmin), vapour pressure deficit (VPD). Daylength is at sowing and the other weather variables are averages from sowing to average time of flowering of 20 genotypes. Carbon isotope composition ( $\delta^{13}\text{C}$ ) and thermal time from sowing to flowering are averages ( $\pm$  s.e.) across 20 genotypes. (b) Relationship between carbon isotope composition ( $\delta^{13}\text{C}$ ) and water supply : vapour pressure deficit ratio. Water supply and VPD are average from sowing to average time of flowering of 20 genotypes; owing to the lack of reliable measurement of plant available water at sowing, water supply was calculated as the sum of rainfall and irrigation. The line is the least square regression. (c) Variation in  $\delta^{13}\text{C}$  with water regime, season and sowing date. In b and c,  $\delta^{13}\text{C}$  is the environmental mean, calculated as the average of 20 genotypes. In b and c, error bars are two standard errors of the mean and are not shown when smaller than symbol.

237

238 *Hypothesis 1: time to flowering is shortened in proportion to plant water deficit and this effect is*  
 239 *genotype-dependent*

240 Broad-sense heritability of thermal time to flowering was 0.98; it varied with genotype, water regime and  
 241 sowing time from 885 °Cd or 69 d for late-sown Sonali in the dry treatment to 1362 °Cd or 109 d for  
 242 early-sown Genesis Kalkee in the wet treatment (Table 1, Supplementary Table 2).

243 Table 1. Thermal time (°Cd) from sowing to flowering in 20 chickpea genotypes grown under two water regimes  
 244 (wet, dry) and two sowing times (early, late). Superscripts indicate (d) Desi and (k) Kabuli genotypes. Data are  
 245 averaged for two seasons.

| Genotype                    | Scale (°Cd)  |      |      |      |             |      |      |      |      |      |      |      |
|-----------------------------|--------------|------|------|------|-------------|------|------|------|------|------|------|------|
|                             | 850          | 900  | 950  | 1000 | 1050        | 1100 | 1150 | 1200 | 1250 | 1300 | 1350 | 1400 |
|                             | Early sowing |      |      |      | Late sowing |      |      |      |      |      |      |      |
|                             | Wet          |      | Dry  |      | Wet         |      | Dry  |      |      |      |      |      |
|                             | Mean         | s.e. | Mean | s.e. | Mean        | s.e. | Mean | s.e. | Mean | s.e. | Mean | s.e. |
| Sonali <sup>d</sup>         | 1054         | 31.6 | 1006 | 24.8 | 902         | 31.4 | 885  | 44.0 |      |      |      |      |
| PBA Striker <sup>d</sup>    | 1119         | 35.5 | 1006 | 24.9 | 943         | 42.6 | 926  | 61.3 |      |      |      |      |
| Genesis836 <sup>d</sup>     | 1138         | 34.1 | 1058 | 33.6 | 976         | 43.7 | 982  | 44.5 |      |      |      |      |
| CICA1229 <sup>d</sup>       | 1147         | 39.6 | 993  | 27.0 | 954         | 60.5 | 944  | 64.2 |      |      |      |      |
| CICA0857 <sup>k</sup>       | 1152         | 33.6 | 1006 | 31.3 | 977         | 41.8 | 962  | 56.0 |      |      |      |      |
| Genesis079 <sup>k</sup>     | 1158         | 32.8 | 997  | 32.3 | 967         | 52.9 | 928  | 62.9 |      |      |      |      |
| CICA1016 <sup>d</sup>       | 1165         | 37.6 | 1042 | 27.8 | 997         | 54.6 | 1018 | 67.6 |      |      |      |      |
| Howzat <sup>d</sup>         | 1166         | 32.2 | 1021 | 28.2 | 999         | 52.3 | 980  | 60.4 |      |      |      |      |
| Genesis509 <sup>d</sup>     | 1169         | 33.6 | 1052 | 21.0 | 1005        | 53.1 | 991  | 53.4 |      |      |      |      |
| PBA Boundary <sup>d</sup>   | 1178         | 35.1 | 1064 | 29.0 | 997         | 47.6 | 997  | 52.7 |      |      |      |      |
| PBA Slasher <sup>d</sup>    | 1180         | 35.9 | 1022 | 35.5 | 991         | 51.7 | 971  | 56.8 |      |      |      |      |
| CICA1007 <sup>d</sup>       | 1183         | 32.2 | 1065 | 31.4 | 1003        | 48.7 | 1018 | 60.0 |      |      |      |      |
| PBA Pistol <sup>d</sup>     | 1184         | 36.4 | 1046 | 35.0 | 983         | 52.0 | 953  | 72.8 |      |      |      |      |
| PBA HatTrick <sup>d</sup>   | 1193         | 34.2 | 1059 | 28.0 | 999         | 49.0 | 1006 | 60.0 |      |      |      |      |
| CICA0912 <sup>d</sup>       | 1199         | 41.6 | 1077 | 31.2 | 1026        | 57.1 | 1023 | 62.8 |      |      |      |      |
| Almaz <sup>k</sup>          | 1210         | 17.1 | 1158 | 27.9 | 1047        | 40.4 | 1020 | 59.0 |      |      |      |      |
| Jimbour <sup>d</sup>        | 1235         | 41.2 | 1125 | 28.9 | 1038        | 55.1 | 1037 | 62.4 |      |      |      |      |
| Kyabra <sup>d</sup>         | 1263         | 41.5 | 1134 | 26.4 | 1043        | 54.2 | 1043 | 59.6 |      |      |      |      |
| Genesis090 <sup>k</sup>     | 1315         | 25.4 | 1121 | 16.8 | 1055        | 47.3 | 1038 | 64.2 |      |      |      |      |
| Genesis Kalkee <sup>k</sup> | 1362         | 35.7 | 1143 | 12.6 | 1119        | 42.1 | 1095 | 56.4 |      |      |      |      |

246 Broad-sense heritability of  $\delta^{13}\text{C}$  was 0.78 and thermal time from sowing to flowering correlated strongly  
 247 with  $\delta^{13}\text{C}$  (Figure 3a). A non-linear model improved slightly the correlation between thermal to flowering  
 248 and  $\delta^{13}\text{C}$ , with  $p = 0.003$  for the quadratic term (dashed line in Fig. 3a).

249 Broad-sense heritability of seed weight was 0.99. As expected from pleiotropic effects, thermal time to  
 250 flowering correlated with seed weight; the slope of the RMA regression,  $0.63 \text{ } ^\circ\text{Cd mg}^{-1}$ , could be useful  
 251 for modelling (Fig. 3b).

252 Broad-sense heritability of drought effect on phenology was 0.61. This trait varied with genotype,  
 253 sowing time, and with the interaction between genotype and sowing time: 4.6-fold in early-sown crops,  
 254 from  $47 \text{ } ^\circ\text{Cd}$  in Sonali to  $218 \text{ } ^\circ\text{Cd}$  in Genesis Kalkee, and smaller (1.9-fold) variation in their late-sown  
 255 counterparts (Fig. 4, Supplementary Table 3).

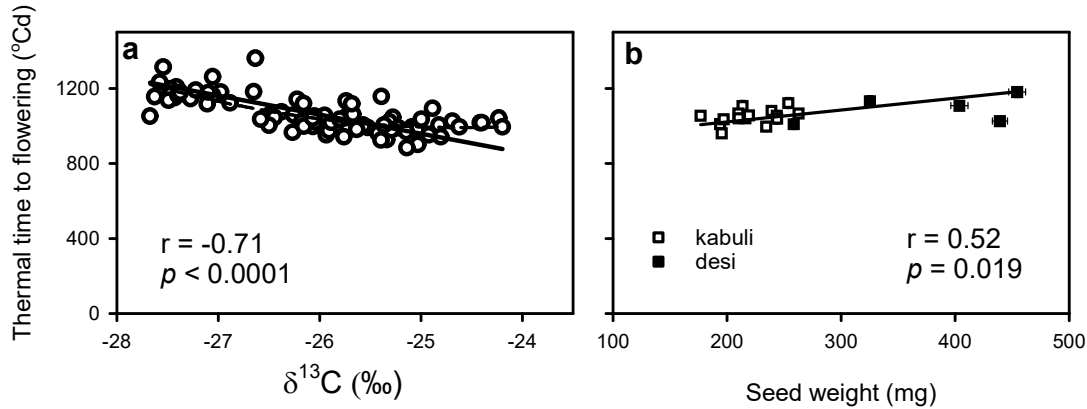

256

Figure 3. (a) Association between thermal time from sowing to 50% flowering and carbon isotope composition  $\delta^{13}\text{C}$  in 20 chickpea genotypes grown under two water regimes and two sowing dates across two seasons. (b) Association between thermal time from sowing to 50% flowering and average seed weight for 20 genotypes averaged across sources of variation. In b, error bars are two standard errors and are not shown when smaller than symbol. In a, b, the solid lines are reduced maximum axis regression (RMA, Model II) to account for error in both x and y (Niklas, 1994). The dashed line in (a) is a quadratic model with slightly higher  $r^2$  than the linear model (0.54 vs 0.49).

257

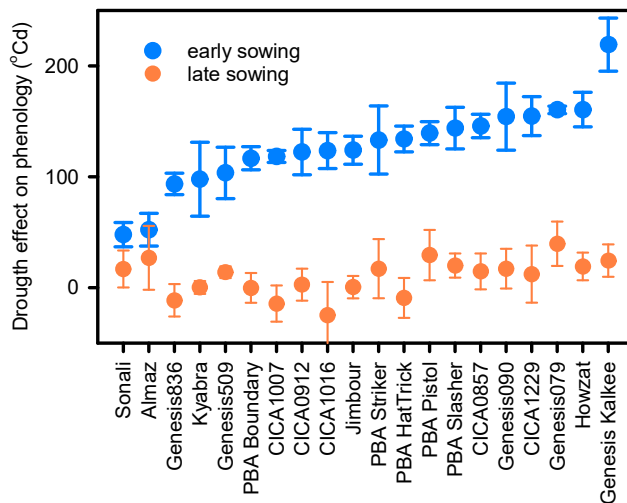

Figure 4. Genotype-dependent variation in drought effect on phenology, defined as the difference in thermal time from sowing to flowering between dry and wet treatments. Data are averaged across two experimental seasons and error bars are two standard errors.

261 Hypothesis 2:  $F_{ST}$  genome scan revealed genes associated with temperature-independent and  
262 temperature-dependent effects of drought on phenology

263 Figure 5 shows the  $F_{ST}$  genome scan to probe for the effects of drought on phenology, Supplementary  
264 Table 4 lists the genes located within 250kb of the genomic regions under selection (top 0.1%  $F_{ST}$ ) for  
265 this trait, and Table 2 summarises selected candidate genes. Genomic regions on chromosomes 4, 5, 7  
266 and 8 were under selection for *DEP*. For early sowing,  $F_{ST}$  scan identified four genomic regions on  
267 chromosomes 5 and 8 that were under selection. For late sowing, four regions on chromosomes 4, 5, 6  
268 and 8 were found under selection. Regions on chromosome 8 common to the two sowing times, which  
269 are only ~100kb apart with high linkage disequilibrium among SNPs ( $r^2 = 0.42$ ), indicate a common set  
270 of genes associated with drought effect on phenology independent of temperature.

271

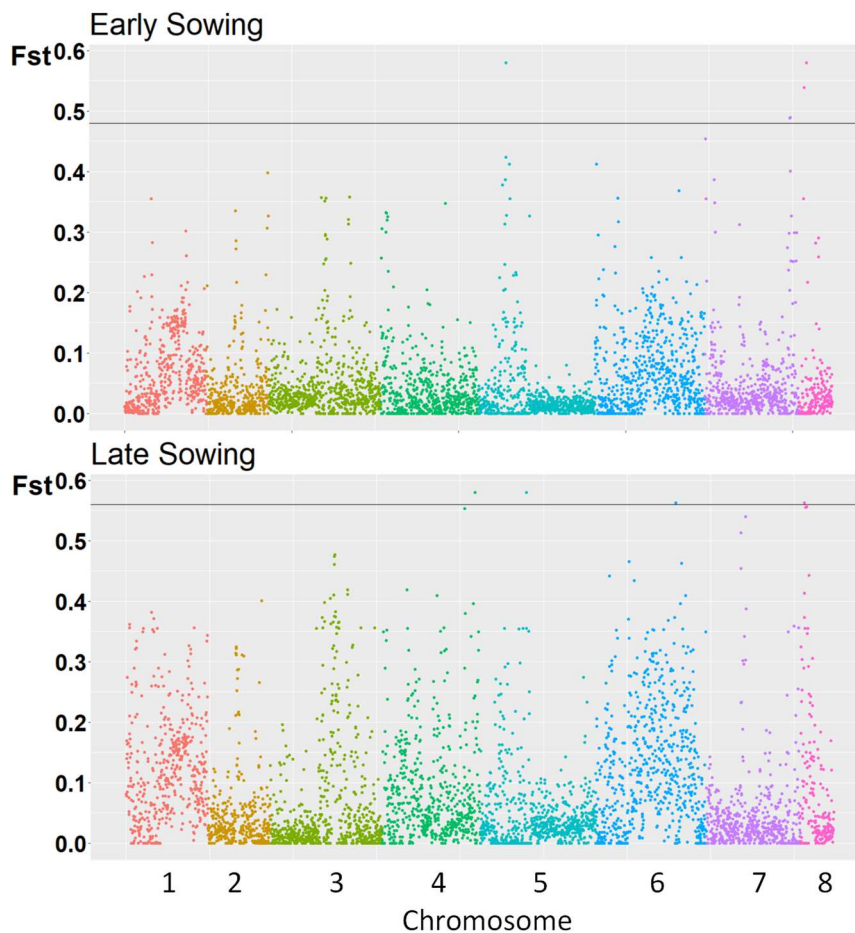

Figure 5  $F_{ST}$  genome scan for drought effect on phenology in early and late sown chickpea. The x-axis corresponds to the eight chickpea chromosomes and each dot represents a  $F_{ST}$  estimated using SNPs from a window of 100 kb region. The horizontal line is the top 0.1% threshold. Dots above the threshold are genomic regions considered to be under selection for drought effect on phenology.

272 Table 2 Selected candidate genes identified to be under selection for drought effect on phenology. Three groups  
 273 are considered: genes only identified in early- or late-sown crops (blue background), and those common to early-  
 274 and late-sown crops.

275

| Sowing time    | Gene name (symbol)                                          | Physical position (ref. Kabuli v2.6.3) | Biological function                  | Gene ID/UniRef90 | Reference                                                   |
|----------------|-------------------------------------------------------------|----------------------------------------|--------------------------------------|------------------|-------------------------------------------------------------|
| early          | Embryonic flower 1 ( <i>EMF1</i> )                          | Ca5:16,086,977-16,091,507              | represses floral development         | UPI00032A669A    | (Aubert <i>et al.</i> , 2001; Calonje <i>et al.</i> , 2008) |
| early          | BRANCHED 1 ( <i>BRC1/TCP18</i> )                            | Ca7:51259601-51260766                  | represses the floral transition      | UPI00032A8FB8    | (Niwa <i>et al.</i> , 2013)                                 |
| early          | BRASSINAZOLE-RESISTANT 1 ( <i>BZR1</i> )                    | Ca8:4708153-4710162                    | regulates ovule and seed development | G7KC60           | (Huang <i>et al.</i> , 2013)                                |
| early and late | Barely any meristem 1 ( <i>BAM1</i> )                       | Ca8:3107330-3111514                    | ovule & pollen development           | UPI00032AB81E    | (DeYoung <i>et al.</i> , 2006)                              |
| early and late | Barely any meristem 2 ( <i>BAM2</i> )                       | Ca8:3118884-3119552                    | ovule & pollen development           | NA               | (DeYoung and Innes, 2006)                                   |
| early and late | HAESA-LIKE2 ( <i>HSL2</i> )                                 | Ca8:3131445-3134732                    | activates floral organ abscission    | UPI00032ABF95    | (Gubert and Liljegren, 2014)                                |
| early and late | AINTEGUMENTA ( <i>ANT</i> )                                 | Ca8:3252643-3255893                    | increases growth of floral organs    | UPI00032A56D4    | (Elliott <i>et al.</i> , 1996; Krizek, 2009)                |
| late           | No Pollen Germination1 Related ( <i>NPGR1</i> )             | Ca4:55771835-55775580                  | promotes pollen germination          | UPI00032A89E3    | (Golovkin and Reddy, 2003)                                  |
| late           | EMBRYONIC FLOWER 2 ( <i>EMF2</i> )                          | Ca8:2508573-2516476                    | represses floral development         | UPI00032ACD72    | (Yoshida <i>et al.</i> , 2001)                              |
| late           | ethylene-responsive transcription factors 1 ( <i>ERF1</i> ) | Ca8:2490746-2491517                    | delays flowering/floral initiation   | UPI00032A5119    | (Chen <i>et al.</i> , 2021)                                 |

276

277 *Hypothesis 3. Water deficit modulation of phenology drives a site-dependent reduction in water stress*  
 278 *and heat stress at the expense of cold risk in eastern Australia*

279 Figure 6 shows histograms of modelled flowering time, water stress index and temperature in the  
 280 critical period, and Supplementary Table 5 summarises the associated statistics. On average, time to  
 281 flowering was 16 d or 227 °Cd shorter in the responsive genotype compared to its unresponsive  
 282 counterpart.

283 The frequency distribution of water stress index was J-shaped, with negative skewness and positive  
 284 kurtosis. The number of cases with  $WSI = 1$  (no stress) decreased from 5384 out of 7041 (76%) in the  
 285 responsive genotype to 3186 (45%) for the unresponsive one.

286 Owing to the hastened phenology with water deficit, the responsive genotype averaged 1.9 °C lower  
 287 maximum temperature, 1.6 °C lower minimum temperature and 1.7 °C lower mean temperature in the

288 critical period than the unresponsive genotype. Maximum temperature over 30 °C (Devasirvatham *et*  
 289 *al.*, 2012) and mean temperature below 15 °C (Berger *et al.*, 2012) in the critical period compromise  
 290 chickpea reproduction. Maximum temperature over 30 °C was reduced from 183 cases in the  
 291 unresponsive genotype to no cases for its responsive counterpart. Mean temperature below 15 °C  
 292 increased from 2148 cases (31%) in the unresponsive genotype to 3073 cases (44%) for its responsive  
 293 counterpart.

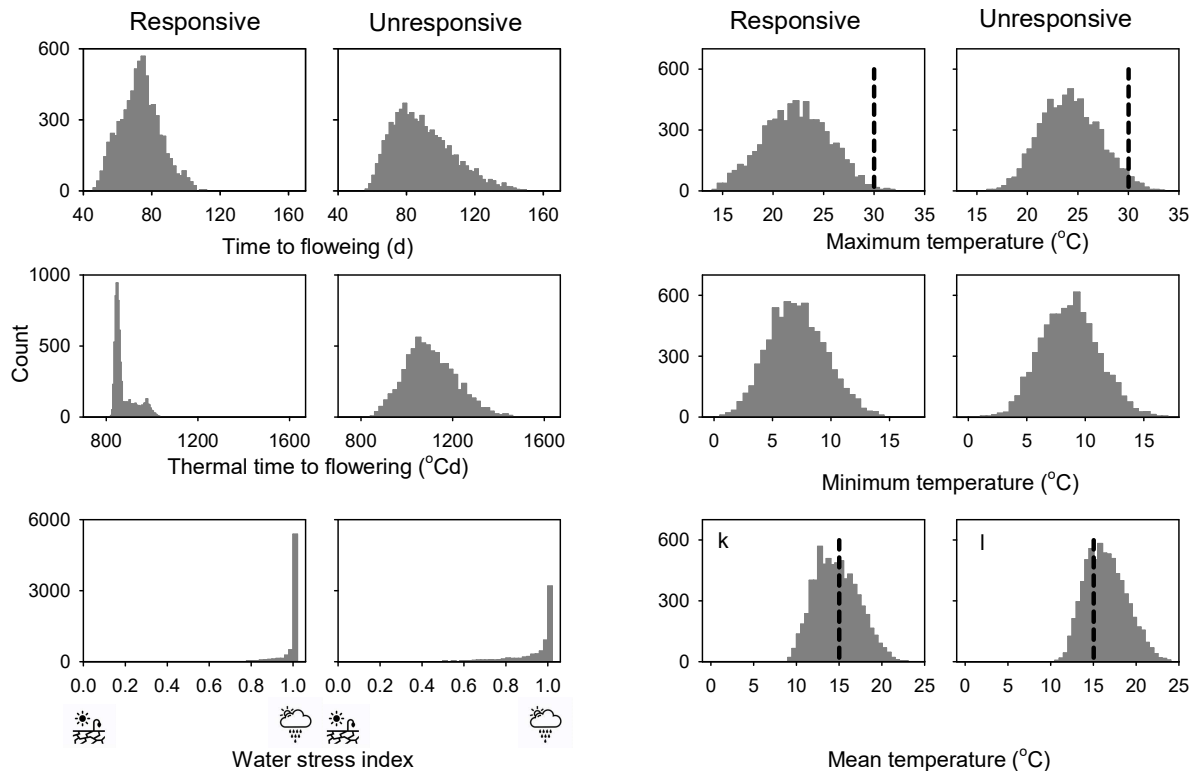

294  
 295  
 Figure 6. Frequency distribution of time from sowing to flowering and thermal time from sowing to flowering, and water stress index, maximum, minimum and mean temperature in the critical period of chickpea for a genotype phenologically responsive to water deficit and an unresponsive genotype. Modelled data from the combination of 11 locations, 65 seasons, two levels of initial soil water and five sowing dates ( $n = 7041$ , resulting from 7150 combinations minus 109 failed crops). The dashed lines are thresholds for reproductive disruption: above 30 °C for maximum temperature (Devasirvatham *et al.*, 2012) and below 15 °C for mean temperature (Berger *et al.*, 2012).

295

296 One-to-one comparisons help visualise the difference in water stress and temperature in the critical  
 297 period between responsive and unresponsive genotypes (Fig. 7aei). Data close to the  $y = x$  line would  
 298 indicate no difference between genotypes. The water stress index was on or below the  $y = x$  line in Fig.  
 299 7a, highlighting the consistent alleviation of drought associated with the hastening of flowering in the  
 300 genotype responsive to water deficit. The one-to-one comparison showed most data were above the  $y$   
 301  $= x$  line for both maximum and minimum temperature, reflecting the cooler critical period associated  
 302 with earlier flowering in the responsive genotype (Fig. 7e, i). However, there were departures from this



303 trend as the responsive genotype experienced lower maximum temperature than the unresponsive  
 304 genotype in 839 cases (12%) and lower minimum temperature in 1170 cases (17%).

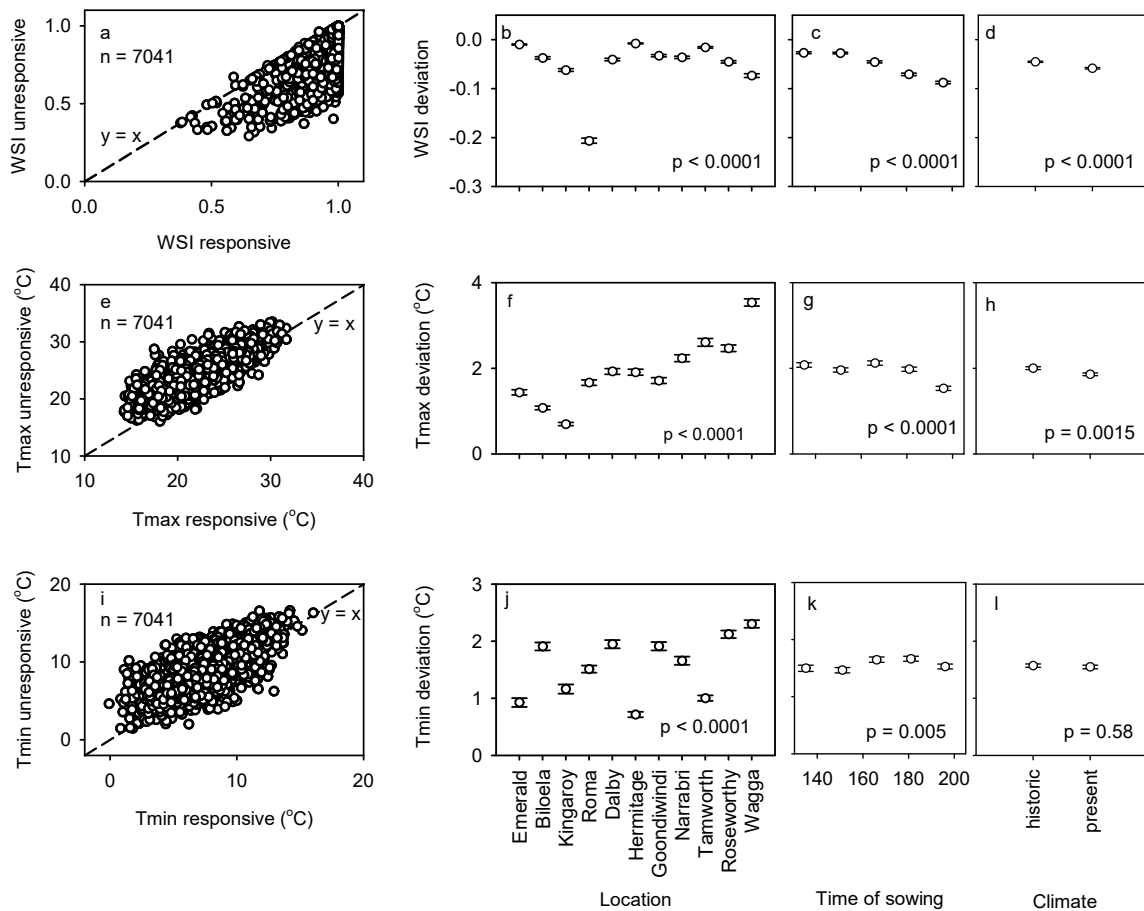

305

306

Figure 7. One-to-one comparisons of (a) water stress index, (e) maximum temperature and (i) minimum temperature during the critical period of chickpea between unresponsive and responsive genotypes. Modelled data are from the combination of 11 locations, 65 seasons, two levels of initial soil water and five sowing dates ( $n = 7041$ , resulting from 7150 combinations minus 109 failed crops). The dashed line,  $y = x$ , represents the null hypothesis of no difference between genotypes. Average deviation of *WSI* from the  $y = x$  line for (f) 11 locations, (c) five sowing times, and (d) historic and present climate. Average deviation of maximum temperature from the  $y = x$  line for (f) 11 locations, (g) five sowing times, and (h) historic and present climate. Average deviation of minimum temperature from the  $y = x$  line for (j) 11 locations, (k) five sowing times, and (l) historic and present climate. In bcd, fgh, jkl error bars are two standard errors and  $p$  from ANOVA. In bcf, locations are from north to south.

307

308 Deviations of the water stress index from the  $y = x$  line varied with location, sowing time, and climate  
 309 (Fig. 7bcd). Owing to the large data set, all three sources of variation returned  $p < 0.0001$ , but the size  
 310 of the effect ranked location  $>$  sowing time  $>$  climate (Fig. 7bcd). The deviation was small in Emerald  
 311 and Hermitage, and largest in Roma due to shallow soil (0.7 m) in this location. The deviations of water

312 stress index from the  $y = x$  line were larger in more stressful locations (Supplementary Figure 2),  
313 indicating a larger adaptive value of drought effect on phenology under more severe drought.  
314 Deviations in water stress index from the  $y = x$  line declined from early to late sown crops (Fig. 7c) and  
315 were slightly larger for present compared to historic climate (Fig. 7d). For maximum (Fig. 7fgh) and  
316 minimum temperature (Fig. 7jkl), deviations were larger for location than for time of sowing, with little or  
317 no variation with climate. The deviations for maximum temperature increased southwards (Fig. 7f) with  
318 no latitudinal trend for minimum temperature (Fig. 7j).

319

## 320 Discussion

321 In this study we define a new trait, drought effect on phenology, and demonstrate it is genotype-  
322 dependent, with a broad-sense heritability of 0.61 for our combination of genotypes and environments  
323 (Fig. 4); it comprises temperature-dependent and temperature-independent components associated  
324 with distinct genomic regions (Fig. 5) that map to genes related to floral development, hormone  
325 signalling and abiotic stress signalling (Supplementary Table 4, Table 2), and is involved in a site-  
326 dependent adaptive trade-off whereby a hastening of reproductive development with water deficit  
327 reduces the risk of drought and heat stress during the critical period of yield formation at the expense of  
328 cold risk (Fig. 6, 7, Supplementary Fig. 2).

329

330 *Candidate genes involved in the development of reproductive organs, hormone signalling and abiotic*  
331 *stress signalling were under selection for drought effect on phenology*

332  $F_{ST}$  genome scan reliably identifies genomic regions associated with ecologically and agronomically  
333 important traits in small populations (Barr *et al.*, 2021; Jordan *et al.*, 2015; Li *et al.*, 2017; Sadras *et al.*,  
334 2016; Van Bocxlaer, 2017; Xu *et al.*, 2012). Genomic regions associated with *DEP* in early- or late-  
335 sown crops, but not in both, were assumed to reflect the temperature-dependent component of the trait.  
336 There were 232 predicted genes located within 250kb of the peaks for *DEP* in early sowing, including  
337 genes involved in floral development, hormone signalling and abiotic stress signalling. For example, the  
338 embryonic flower 1 (*EMF1*) gene is a repressor of the floral meristem determinacy gene *AGAMOUS*  
339 during vegetative development in *Arabidopsis thaliana* via polycomb group (PcG)-mediated gene  
340 silencing (Aubert *et al.*, 2001; Calonje *et al.*, 2008). Another gene, *BRANCHED1* (*BRC1/TCP18*),  
341 interacts with the florigen proteins *FLOWERING LOCUS T* (*FT*) to repress the floral transition of the  
342 axillary meristems in *A. thaliana* (Niwa *et al.*, 2013). There were 240 predicted genes located within  
343 250kb of the  $F_{ST}$  peaks for *DEP* in late sowing (Supplementary Table 4). Some of them are involved in

344 floral development and abiotic stress signalling. Among them, EMBRYONIC FLOWER 2 (*EMF2*) has  
345 been revealed to encode a novel zinc finger protein that repress reproductive development by changing  
346 flowering time and shoot morphogenesis (Yoshida *et al.*, 2001). Further, *EMF2* protein was recruited to  
347 interact with several key regulatory genes (*ABI3*, *LOV1*, and *FLC*) involved in *FLC*-mediated flowering  
348 pathway, seed development, and cold signalling (Kim *et al.*, 2010). We also identified the *NPGR1* gene  
349 (No Pollen Germination1 Related), one of the three closely related calmodulin-binding proteins, which is  
350 essential for pollen germination (Golovkin and Reddy, 2003). Additionally, there are four ethylene-  
351 responsive transcription factors: *ERF110*, *ERF1A*, *ERF034*, and *WIN1*. They all contain a DNA binding  
352 domain (AP2 domain) that could bind to genes that respond to abiotic and biotic stresses (Muller and  
353 Munne-Bosch, 2015). Some members of the ERF family regulate floral development through  
354 environmental stimuli or hormones (Krizek, 2009; Licausi *et al.*, 2013). One key, well-characterised  
355 member, *ERF1*, is involved in ethylene signalling (Muller and Munne-Bosch, 2015), and drought and  
356 heat stress (Cheng *et al.*, 2013). Recently, *ERF1* was shown to associate with a delay in *Arabidopsis*  
357 flowering/floral initiation through direct inhibition of the expression of the key floral integrator *FT* (Chen  
358 *et al.*, 2021). Of interest, some ERFs play a role in plant-pathogen relations providing further biological  
359 links between phenological development and disease resistance. For example, *ERF5* and *ERF6* are  
360 positive regulators of JA-mediated defence and their constitutive expression increased resistance of *A.*  
361 *thaliana* to the fungal necrotroph *Botrytis cinerea* (Moffat *et al.*, 2012). *Magnaporthe oryzae*, the causal  
362 agent of rice blast disease, strongly induced RiceOsERF922, encoding an APETELA2/ethylene  
363 response factor (AP2/ERF) (Liu *et al.*, 2012). The phenotypic and genetic links between phenological  
364 development and disease tolerance have been and remain critical for chickpea adaptation, as  
365 discussed in the next section.

366

367  $F_{ST}$  peaks on chromosome 8 common to early and late sowing are nearby (~100kb) with high linkage  
368 disequilibrium. The 250kb regions surrounding the two peaks overlapped and contain genes associated  
369 with a temperature-independent drought effect on phenology. In this region, a cluster of four genes was  
370 identified that relates to floral and reproductive development of *Arabidopsis*. One of them is the  
371 HAESA-LIKE2 (*HSL2*) receptor-like kinase that activates floral organ abscission, a cell-separation  
372 process that allows plants to develop their organ shape in response to developmental cues and  
373 environmental stress (Gubert and Liljegren, 2014). The other two genes, *BAM1* and *BAM2*, play  
374 important roles in ovule and pollen formation (DeYoung and Innes, 2006; Hord *et al.*, 2006). Their  
375 functions appear to be overlapping and opposite to that of *CLAVATA 1*, a key protein kinase in  
376 regulating the development of shoot and flower meristems. The *BAM2* gene in the chickpea reference  
377 genome Kabuli v2.6.3 is incomplete, with only 200bp of the total ~3000bp length. It is unclear whether

378 this is an assembly error or a loss of function deletion that often arises from gene duplication. We also  
379 identified the AP2 transcription factor AINTEGUMENTA (*ANT*) gene, which is involved in regulating  
380 ovule and female gametophyte development and promotes early floral primordia growth through  
381 stimulating cell growth in floral organs (Elliott *et al.*, 1996; Krizek, 2009; Krizek *et al.*, 2021).  
382 Interestingly, the upstream regulator of *ANT*, BRASSINAZOLE-RESISTANT 1 (*BZR1*), locates in  
383 another  $F_{ST}$  peak for *DEP* in early sowing (1.5Mb away from each other). The *BZR1* mutant can  
384 increase the number of ovules and seeds in *Arabidopsis* through the brassinosteroid signalling pathway  
385 (Huang *et al.*, 2013). Also, *BZR1* was able to up-regulate the expression of *ANT* by binding to its  
386 promoter sequence and is thus involved in plant reproductive development (Huang *et al.*, 2013).  
387 We did not find any genomic region under selection for *DEP* overlapping the typical genes reported for  
388 flowering time in response to photoperiod and temperature in chickpea (Gaur *et al.*, 2015; Gursky *et al.*,  
389 2018). The corollary of this putative genetic independence is that phenotypes combining slow or fast  
390 development, as mediated by photoperiod and temperature, and small or large responsiveness to  
391 drought can be tailored to target environments.

#### 392 *Drought effect on phenology may be adaptive and involves trade-offs*

393 To interpret the assumed adaptive value of drought effect on phenology, we first outline the interplay  
394 between phenology, climate, and Ascochyta blight, as drivers of evolution, and early and contemporary  
395 cultivation of chickpea (Abbo *et al.*, 2002; Abbo *et al.*, 2003; Abbo *et al.*, 2008; Daba *et al.*, 2016a;  
396 Kumar and Abbo, 2001; Li *et al.*, 2017; Lichtenzveig *et al.*, 2006). In the Near East's archaeological  
397 record, chickpea first appears with the "large-seeded legumes" about 13,000 Cal BP, followed by a gap  
398 of about 3,000 years, and its re-appearance in the Bronze age. The gap has been attributed to  
399 Ascochyta blight, which devastated autumn-sown crops, and the re-appearance of the crop associated  
400 with the shift from autumn to spring sowing to avoid disease (Abbo *et al.*, 2003). The selective pressure  
401 in favour of a spring-summer phenotype has reduced or eliminated vernalization requirements in  
402 cultivated chickpea in comparison to both wild *Cicer spp* and the companion foundational crops in the  
403 Levante (Abbo *et al.*, 2002; Abbo *et al.*, 2003; Berger *et al.*, 2005; Kumar and Abbo, 2001; Pinhasi Van-  
404 Oss *et al.*, 2016). In western Canada where short growing season and Ascochyta blight challenge  
405 contemporary chickpea production, a collection of recombinant inbred lines showed negative  
406 correlations between days to flowering and Ascochyta blight resistance, and revealed clusters of QTL  
407 for days to flowering and blight resistance that partially overlap on chromosomes 3 (8.6–23.11 cM) and  
408 8 (53.88–62.33 cM) (Daba *et al.*, 2016a). In Australia where the current crop is autumn-sown, the  
409 legacy of selection for summer growth habit is apparent in two traits: slow canopy growth under low

410 temperature, compared to other autumn-sown pulses such as field pea, and a high rate of pod abortion  
411 in cool springs (Berger *et al.*, 2005; Lake *et al.*, 2016). These traits determine that severe drought is  
412 unlikely before flowering (Chauhan *et al.*, 2017; Lake *et al.*, 2016).

413

414 Against this ecological and agronomic background, we modelled the relative risk of drought, heat, and  
415 cold stress in the critical period for two contrasting genotypes. We found that drought effect on  
416 phenology consistently alleviates the severity of drought during the critical period of yield formation, and  
417 that the adaptive value of this trait is higher in more stressful environments, e.g., shallow soil and late  
418 sowing. The consistent alleviation of drought stress with hastened flowering relates to the pattern of  
419 drought in these environments and cannot be extrapolated to other conditions such as intermittent  
420 drought (Jordan and Miller, 1980; Schwinning and Ehleringer, 2001; Tardieu, 2012). Owing to the  
421 strong seasonality of rainfall in eastern Australia, crops mostly rely on in-season rainfall in the southern  
422 locations of our transect, and rely primarily on stored soil water in the northern locations (Sadras and  
423 Rodriguez, 2007); this geographical divide mirrors the early selective pressures for autumn- and spring-  
424 sown crops outlined above. In both cases, slow-growing crops and high availability of soil water (north)  
425 or winter rainfall (south) combine to return typically unstressed conditions early in the season, and a  
426 characteristic terminal drought with declining water availability during critical reproductive stages in  
427 spring as illustrated in Fig. 1a (Chauhan *et al.*, 2017; Lake *et al.*, 2016). The reliability of environmental  
428 cues influences the evolution of signalling pathways in plants (Aphalo and Sadras, 2022); a predictable  
429 drought pattern over long time scales (millennia) is thus consistent with the selection for hastened  
430 flowering in response to drought. The responsive genotype had lower maximum temperature during the  
431 critical period, that can further contribute to seed yield, and lower minimum temperature, which could  
432 compromise pod set (Berger *et al.*, 2012; Devasirvatham *et al.*, 2012).

433

#### 434 **Conclusion: biological, agronomic, and modelling implications, and further research**

435 The combination of experiments in realistic field conditions,  $F_{ST}$  genome scan, and modelling,  
436 highlighted the agronomic importance of water deficit effect on chickpea phenology, an overlooked trait.  
437 Controlled experiments combining water and thermal regimes, ideally with isogenic lines, are needed to  
438 unequivocally assess the agronomic value, i.e., seed yield response, of drought effect on phenology.  
439 The genetic variation in our small sample and the relatively high heritability of this trait suggest further  
440 research is warranted for breeding applications. Several candidate genes homologous to *Arabidopsis*  
441 *thaliana* involved in the development of floral and reproductive tissues and stress responses were  
442 identified with a putative role in the response of chickpea phenology to drought. Of note, the core  
443 genetic regulatory network canalizing the flowering signals to the decision to flower in *A. thaliana*

444 partially holds in chickpea (Gursky *et al.*, 2018). Further molecular function experiments are needed to  
445 establish their roles for this trait. Irrespective of the actual genes and metabolic pathways, we  
446 demonstrated a strong influence of drought on reproductive development that needs to be incorporated  
447 in both genetic models (Gursky *et al.*, 2018) and phenotype models that simulate crop phenology,  
448 carbon and water dynamics, growth and yield (Chauhan *et al.*, 2019). Models exclusively based on  
449 temperature and photoperiod are bound to return biased predictions of phenology, and hence  
450 unreliable predictions of crop adaptation to future, drier climates in Australia and elsewhere.

451

452 **Acknowledgements**

453 We thank the Grains Research and Development Corporation for funding (projects UOT1909-002RTX,  
454 DAS00140), and Francisco Sadras for expert contribution to data analysis.

455

456 **Author Contributions**

457 YL: carried out  $F_{ST}$  analysis, wrote part of the paper; YSC: modelled phenology and water stress; LL:  
458 carried out field experiment, contributed data analysis; JT: carried out statistical analysis; VOS:  
459 developed the concept, designed the experiment, analysed data, wrote the manuscript.

460

461 **Supplementary data**

462 Supplementary data are available at JXB online.

463 Table S1. Genetic parameters to model phenological development.

464 Table S2. ANOVA of thermal time from sowing to flowering, carbon isotope composition, and seed  
465 weight.

466 Table S3. ANOVA of drought effect on phenology.

467 Table S4. Genes located within 250kb of the genomic regions under selection (top 0.1%  $F_{ST}$ ) for *DEP*

468 Table S5. Summary statistics of frequency distributions of flowering time, water stress index and  
469 temperature.

470 Fig. S1. Comparison of drought effect on phenology calculated with difference- and residual-based  
471 approaches.

472 Fig. S2. *WSI* deviation from the  $y = x$  line as a function of environmental mean *WSI*.

473

474 **Data availability**

475 Dryad, Dataset, <https://doi.org/10.5061/dryad.tx95x6b0f>

476

477 **Conflicts of interest.**

478 The authors declare no conflicts of interest.

479



## 480 References

- 481 **Abbo S, Lev-Yadun S, Galwey N.** 2002. Vernalization response of wild chickpea. *New Phytologist* **154**, 695-  
482 701.
- 483 **Abbo S, Shtienberg D, Lichtenzveig J, Lev-Yadun S, Gopher A.** 2003. The chickpea, summer cropping, and  
484 a new model for pulse domestication in the ancient Near East. *Quarterly Review of Biology* **78**, 435-448.
- 485 **Abbo S, Zezak I, Schwartz E, Lev-Yadun S, Kerem Z, Gopher A.** 2008. Wild lentil and chickpea harvest in  
486 Israel: bearing on the origins of Near Eastern farming. *Journal of Archaeological Science* **35**, 3172-3177.
- 487 **Anbzhagan K, Bhatnagar-Mathur P, Sharma KK, Baddam R, Kishor PBK, Vadez V.** 2015. Changes in  
488 timing of water uptake and phenology favours yield gain in terminal water stressed chickpea AtDREB1A  
489 transgenics. *Functional Plant Biology* **42**, 84.
- 490 **Angus JF, Moncur MW.** 1977. Water stress and phenology in wheat. *Australian Journal of Agricultural*  
491 *Research* **28**, 177-181.
- 492 **Aphalo PJ, Sadras VO.** 2022. Explaining Preemptive Acclimation by Linking Information to Plant Phenotype.  
493 *Journal of Experimental Botany*.
- 494 **Aubert D, Chen LJ, Moon YH, Martin D, Castle LA, Yang CH, Sung ZR.** 2001. EMF1, a novel protein involved  
495 in the control of shoot architecture and flowering in Arabidopsis. *The Plant Cell* **13**, 1865-1875.
- 496 **Barr K, Beichman AC, Kalhori P, Rajbhandary J, Bay RA, Ruegg K, Smith TB.** 2021. Persistent panmixia  
497 despite extreme habitat loss and population decline in the threatened tricolored blackbird (*Agelaius tricolor*).  
498 *Evolutionary Applications* **14**, 674-684.
- 499 **Berger JD, Ali M, Basu PS, Chaudhary BD, Chaturvedi SK, Deshmukh PS, Dharmaraj PS, Dwivedi SK,**  
500 **Gangadhar GC, Gaur PM, Kumar J, Pannu RK, Siddique KHM, Singh DN, Singh DR, Singh SJ, Turner NC,**  
501 **Yadava HS, Yadav SS.** 2006. Genotype by environment studies demonstrate the critical role of phenology in  
502 adaptation of chickpea (*Cicer arietinum* L.) to high and low yielding environments of India. *Field Crops Research*  
503 **98**, 230-244.
- 504 **Berger JD, Buck R, Henzell JM, Turner NC.** 2005. Evolution in the genus Cicer - vernalisation response and  
505 low temperature pod set in chickpea (*Cicer arietinum* L.) and its annual wild relatives. *Australian Journal of*  
506 *Agricultural Research* **56**, 1191-1200.
- 507 **Berger JD, Kumar S, Nayyar H, Street KA, Sandhu JS, Henzell JM, Kaur J, Clarke HC.** 2012. Temperature-  
508 stratified screening of chickpea (*Cicer arietinum* L.) genetic resource collections reveals very limited reproductive  
509 chilling tolerance compared to its annual wild relatives. *Field Crops Research* **126**, 119-129.
- 510 **Berger JD, Turner NC, Siddique KHM, Knights EJ, Brinsmead RB, Mock I, Edmondson C, Khan TN.** 2004.  
511 Genotype by environment studies across Australia reveal the importance of phenology for chickpea (*Cicer*  
512 *arietinum* L.) improvement. *Australian Journal of Agricultural Research* **55**, 1071-1084.
- 513 **Booker TR, Yeaman S, Whitlock MC.** 2020. Variation in recombination rate affects detection of outliers in  
514 genome scans under neutrality. *Molecular Ecology* **29**, 4274-4279.
- 515 **Calonje M, Sanchez R, Chen LJ, Sung ZR.** 2008. EMBRYONIC FLOWER1 participates in Polycomb group-  
516 mediated AG gene silencing in *Arabidopsis*. *The Plant Cell* **20**, 277-291.
- 517 **Chauhan YS, Allard S, Williams R, Williams B, Mundree S, Chenu K, Rachaputi NC.** 2017. Characterisation  
518 of chickpea cropping systems in Australia for major abiotic production constraints. *Field Crops Research* **204**,  
519 120-134.
- 520 **Chauhan YS, Ryan M, Chandra S, Sadras VO.** 2019. Accounting for soil moisture improves prediction of  
521 flowering time in chickpea and wheat. *Scientific Reports* **9**, 7510.
- 522 **Chauhan YS, Wright G, Rachaputi N, McCosker K.** 2008. Identifying chickpea homoclims using the APSIM  
523 chickpea model. *Australian Journal of Agricultural Research* **59**, 260-269.
- 524 **Chen YL, Zhang LP, Zhang HY, Chen LG, Yu DQ.** 2021. ERF1 delays flowering through direct inhibition of  
525 FLOWERING LOCUS T expression in Arabidopsis. *Journal of Integrative Plant Biology* **63**, 1712-1723.
- 526 **Cheng MC, Liao PM, Kuo WW, Lin TP.** 2013. The Arabidopsis ETHYLENE RESPONSE FACTOR1 Regulates  
527 Abiotic Stress-Responsive Gene Expression by Binding to Different cis-Acting Elements in Response to Different  
528 Stress Signals. *Plant Physiology* **162**, 1566-1582.
- 529 **Chenu K.** 2015. Characterising the crop environment - nature, significance and applications. In: Sadras VO,  
530 Calderini DF, eds. *Crop physiology: applications for genetic improvement and agronomy*. San Diego: Academic  
531 Press, 321-348.

- 532 **Chenu K, Cooper M, Hammer GL, Mathews KL, Drecer MF, Chapman SC.** 2011. Environment  
533 characterization as an aid to wheat improvement: interpreting genotype-environment interactions by modelling  
534 water-deficit patterns in North-Eastern Australia. *Journal of Experimental Botany* **62**, 1743-1755.
- 535 **Coates BS, Hohenstein JD, Giordano R, Donthu RK, Michel AP, Hodgson EW, O'Neal ME.** 2020. Genome  
536 scan detection of selective sweeps among biotypes of the soybean aphid, *Aphis glycines*, with differing virulence  
537 to resistance to *A. glycines* (Rag) traits in soybean, *Glycine max*. *Insect Biochemistry and Molecular Biology* **124**,  
538 103364.
- 539 **Condon AG, Richards RA, Rebetzke GJ, Farquhar GD.** 2002. Improving Intrinsic Water-Use Efficiency and  
540 Crop Yield. *Crop Science* **42**, 122.
- 541 **Cullis BR, Smith AB, Coombes NE.** 2006. On the design of early generation variety trials with correlated data.  
542 *J. Agric. Biol. Env. Stat.* **11**, 381-393.
- 543 **Daba K, Deokar A, Banniza S, Warkentin TD, Tar'an B, Francki M.** 2016a. QTL mapping of early flowering  
544 and resistance to ascochyta blight in chickpea. *Genome* **59**, 413-425.
- 545 **Daba K, Warkentin TD, Bueckert R, Todd CD, Tar'An B.** 2016b. Determination of Photoperiod-Sensitive  
546 Phase in Chickpea (*Cicer arietinum* L.). *Frontiers in Plant Science* **7**.
- 547 **Devasirvatham V, Tan DKY, Gaur PM, Raju TN, Trethowan RM.** 2012. High temperature tolerance in chickpea  
548 and its implications for plant improvement. *Crop & Pasture Science* **63**, 419-428.
- 549 **DeYoung BJ, Bickle KL, Schrage KJ, Muskett P, Patel K, Clark SE.** 2006. The CLAVATA1-related BAM1,  
550 BAM2 and BAM3 receptor kinase-like proteins are required for meristem function in Arabidopsis. *The Plant*  
551 *Journal* **45**, 1-16.
- 552 **DeYoung BJ, Innes RW.** 2006. Plant NBS-LRR proteins in pathogen sensing and host defense. *Nature*  
553 *Immunology* **7**, 1243-1249.
- 554 **Elliott RC, Betzner AS, Huttner E, Oakes MP, Tucker WQJ, Gerentes D, Perez P, Smyth DR.** 1996.  
555 AINTEGUMENTA, an APETALA2-like gene of Arabidopsis with pleiotropic roles in ovule development and floral  
556 organ growth. *The Plant Cell* **8**, 155-168.
- 557 **Erena MF, Lohraseb I, Munoz-Santa I, Taylor JD, Emebiri LC, Collins NC.** 2021. The WtmsDW Locus on  
558 Wheat Chromosome 2B Controls Major Natural Variation for Floret Sterility Responses to Heat Stress at Booting  
559 Stage. *Frontiers in Plant Science* **12**.
- 560 **Fang XW, Turner NC, Li FM, Siddique KHM.** 2011. An early transient water deficit reduces flower number and  
561 pod production but increases seed size in chickpea (*Cicer arietinum* L.). *Crop and Pasture Science* **62**, 481.
- 562 **Fumagalli M, Vieira FG, Korneliussen TS, Linderoth T, Huerta-Sanchez E, Albrechtsen A, Nielsen R.** 2013.  
563 Quantifying population genetic differentiation from next-generation sequencing data. *Genetics* **195**, 979-992.
- 564 **Fumagalli M, Vieira FG, Linderoth T, Nielsen R.** 2014. ngsTools: methods for population genetics analyses  
565 from next-generation sequencing data. *Bioinformatics* **30**, 1486-1487.
- 566 **Gaur PM, Samineni S, Tripathi S, Varshney RK, Gowda CLL.** 2015. Allelic relationships of flowering time  
567 genes in chickpea. *Euphytica* **203**, 295-308.
- 568 **Golovkin M, Reddy ASN.** 2003. A calmodulin-binding protein from Arabidopsis has an essential role in pollen  
569 germination. *Proceedings of the National Academy of Sciences of the United States of America* **100**, 10558-  
570 10563.
- 571 **Gubert CM, Liljegren SJ.** 2014. HAESA and HAESA-LIKE2 activate organ abscission downstream of  
572 NEVERSHED and EVERSHEDED in Arabidopsis flowers. *Plant Signaling & Behavior* **9**.
- 573 **Gursky VV, Kozlov KN, Nuzhdin SV, Samsonova MG.** 2018. Dynamical Modeling of the Core Gene Network  
574 Controlling Flowering Suggests Cumulative Activation From the FLOWERING LOCUS T Gene Homologs in  
575 Chickpea. *Frontiers in Genetics* **9**.
- 576 **Holsinger KE, Weir BS.** 2009. Genetics in geographically structured populations: defining, estimating and  
577 interpreting F<sub>ST</sub>. *Nature Reviews Genetics* **10**, 639-650.
- 578 **Holworth DP, Huth NI, deVoil PG, Zurcher EJ, Herrmann NI, McLean G, Chenu K, van Oosterom EJ,  
579 Snow V, Murphy C, Moore AD, Brown H, Whish JPM, Verrall S, Fainges J, Bell LW, Peake AS, Poulton PL,  
580 Hochman Z, Thorburn PJ, Gaydon DS, Dalgliesh NP, Rodriguez D, Cox H, Chapman S, Doherty A,  
581 Teixeira E, Sharp J, Cichota R, Vogeler I, Li FY, Wang E, Hammer GL, Robertson MJ, Dimes JP,  
582 Whitbread AM, Hunt J, van Rees H, McClelland T, Carberry PS, Hargreaves JNG, MacLeod N, McDonald  
583 C, Harsdorf J, Wedgwood S, Keating BA.** 2014. APSIM – Evolution towards a new generation of agricultural  
584 systems simulation. *Environmental Modelling & Software* **62**, 327–350.
- 585 **Hord CLH, Chen CB, DeYoung BJ, Clark SE, Ma H.** 2006. The BAM1/BAM2 receptor-like kinases are  
586 important regulators of Arabidopsis early anther development. *The Plant Cell* **18**, 1667-1680.

- 587 **Hovav R, Upadhyaya KC, Beharav A, Abbo S.** 2003. Major flowering time gene and polygene effects on  
588 chickpea seed weight. *Plant Breeding* **122**, 539-541.
- 589 **Huang HY, Jiang WB, Hu YW, Wu P, Zhu JY, Liang WQ, Wang ZY, Lin WH.** 2013. BR Signal Influences  
590 Arabidopsis Ovule and Seed Number through Regulating Related Genes Expression by BZR1. *Molecular Plant*  
591 **6**, 456-469.
- 592 **Hulme M.** 2020. *Climates Multiple: Three Baselines, Two Tolerances, One Normal.* Academia Letters.
- 593 **Hunt JR, Lilley JM, Trevaskis B, Flohr BM, Peake A, Fletcher A, Zwart AB, Gobbett D, Kirkegaard JA.**  
594 2019. Early sowing systems can boost Australian wheat yields despite recent climate change. *Nature Climate*  
595 *Change* **9**, 244-+.
- 596 **Isbell RF.** 1996. *The Australian soil classification.* Melbourne: CSIRO Publishing.
- 597 **Johansen C, Krishnamurthy L, Saxena NP, Sethi SC.** 1994. Genotypic variation in moisture response of  
598 chickpea grown under line-source sprinklers in a semiarid tropical environment. *Field Crops Research* **37**, 103-  
599 112.
- 600 **Jones H.** 1992. Energy balance and evaporation. In: Press CU, ed. *Plants and microclimate: a quantitative*  
601 *approach to environmental plant physiology*, 106-130.
- 602 **Jordan KW, Wang S, Lun Y, Gardiner L-J, MacLachlan R, Hucl P, Wiebe K, Wong D, Forrest KL, Sharpe**  
603 **AG, Sidebottom CHD, Hall N, Toomajian C, Close T, Dubcovsky J, Akhunova A, Talbert L, Bansal UK,**  
604 **Bariana HS, Hayden MJ, Pozniak C, Jeddalo JA, Hall A, Akhunov E, Consortium I.** 2015. A haplotype map  
605 of allohexaploid wheat reveals distinct patterns of selection on homoeologous genomes. *Genome Biology* **16**.
- 606 **Jordan WR, Miller MR.** 1980. Genetic variability in sorghum root system: implications for drought tolerance. In:  
607 Turner NC, Kramer PJ, eds. *Adaptation of plants to water and high temperature stress.* New York: John Wiley  
608 and Sons, 383-399.
- 609 **Kankaanpää T, Vesterinen E, Hardwick B, Schmidt NM, Andersson T, Aspholm PE, Barrio IC, Beckers N,**  
610 **Bêty J, Birkemoe T, Desiervo M, Drotos KHI, Ehrich D, Gilg O, Gilg V, Hein N, Høye TT, Jakobsen KM,**  
611 **Jodouin C, Jorna J, Kozlov MV, Kresse JC, Leandri-Breton DJ, Lecomte N, Loonen M, Marr P, Monckton**  
612 **SK, Olsen M, Otis JA, Pyle M, Roos RE, Raundrup K, Rozhkova D, Sabard B, Sokolov A, Sokolova N,**  
613 **Solecki AM, Urbanowicz C, Villeneuve C, Vyguzova E, Zverev V, Roslin T.** 2020. Parasitoids indicate major  
614 climate-induced shifts in Arctic communities. *Global Change Biology*.
- 615 **Keating BA, Carberry PS, Hammer GL, Probert ME, Robertson MJ, Holzworth D, Huth NI, Hargreaves**  
616 **JNG, Meinke H, Hochman Z, McLean G, Verburg K, Snow V, Dimes JP, Silburn M, Wang E, Brown S,**  
617 **Bristow KL, Asseng S, Chapman S, McCown RL, Freebairn DM, Smith CJ.** 2003. An overview of APSIM, a  
618 model designed for farming systems simulation. *European Journal of Agronomy* **18**, 267 - 288.
- 619 **Kim SY, Zhu T, Sung ZR.** 2010. Epigenetic Regulation of Gene Programs by EMF1 and EMF2 in Arabidopsis.  
620 *Plant Physiology* **152**, 516-528.
- 621 **Korneliussen TS, Albrechtsen A, Nielsen R.** 2014. ANGSD: Analysis of Next Generation Sequencing Data.  
622 *Bmc Bioinformatics* **15**.
- 623 **Krizek BA.** 2009. AINTEGUMENTA and AINTEGUMENTA-LIKE6 Act Redundantly to Regulate Arabidopsis  
624 Floral Growth and Patterning. *Plant Physiology* **150**, 1916-1929.
- 625 **Krizek BA, Bantle AT, Heflin JM, Han H, Freese NH, Loraine AE.** 2021. AINTEGUMENTA and  
626 AINTEGUMENTA-LIKE6 directly regulate floral homeotic, growth, and vascular development genes in young  
627 Arabidopsis flowers. *Journal of Experimental Botany* **72**, 5478-5493.
- 628 **Kumar J, Abbo S.** 2001. Genetics of flowering time in chickpea and its bearing on productivity in semiarid  
629 environments. Elsevier, 107-138.
- 630 **Lake L, Chauhan YS, Ojeda JJ, Cossani CM, Thomas D, Hayman PT, Sadras VO.** 2021. Modelling  
631 phenology to probe for trade-offs between frost and heat risk in lentil and faba bean. *European Journal of*  
632 *Agronomy* **122**, 126154.
- 633 **Lake L, Chenu K, Sadras VO.** 2016. Patterns of water stress and temperature for Australian chickpea  
634 production. *Crop and Pasture Science* **67**, 204-215.
- 635 **Lake L, Sadras VO.** 2014. The critical period for yield determination in chickpea (*Cicer arietinum* L.) *Field Crops*  
636 *Research* **168**, 1-7.
- 637 **Levine E, Spencer JL, Isard SA, Onstad DW, Gray ME.** 2002. Adaptation of the Western Corn Rootworm to  
638 Crop Rotation: Evolution of a New Strain in Response to a Management Practice. *American Entomologist* **48**, 94-  
639 107.



- 640 **Li Y, Ruperao P, Batley J, Edwards D, Davidson J, Hobson K, Sutton T.** 2017. Genome Analysis Identified  
641 Novel Candidate Genes for Ascochyta Blight Resistance in Chickpea Using Whole Genome Re-sequencing  
642 Data. *Frontiers in Plant Science* **8**, 359.
- 643 **Licausi F, Ohme-Takagi M, Perata P.** 2013. APETALA/Ethylene Responsive Factor (AP2/ERF) transcription  
644 factors: mediators of stress responses and developmental programs. *New Phytologist* **199**, 639-649.
- 645 **Lichtenzweig J, Bonfil DJ, Zhang H-B, Shtienberg D, Abbo S.** 2006. Mapping quantitative trait loci in chickpea  
646 associated with time to flowering and resistance to *Didymella rabiei* the causal agent of Ascochyta blight.  
647 *Theoretical and Applied Genetics* **113**, 1357-1369.
- 648 **Liu D, Chen X, Liu J, Ye J, Guo Z.** 2012. The rice ERF transcription factor OsERF922 negatively regulates  
649 resistance to *Magnaporthe oryzae* and salt tolerance. *Journal of Experimental Botany* **63**, 3899-3911.
- 650 **Lizarazo CI, Isotalo J, Lindfors AV, Stoddard FL.** 2017. Progress towards flowering of faba bean (*Vicia*  
651 *faba* L.) is more than photothermal. *Journal of Agronomy and Crop Science* **203**, 385-396.
- 652 **Mauney J, Phillips LL.** 1963. Influence of daylength and night temperature on flowering of *Gossypium*. *Botanical*  
653 *Gazette* **124**, 278-283.
- 654 **McDonald GK, Taylor JD, Gong X, Bovill W.** 2018. Responses to phosphorus among barley genotypes. *Crop*  
655 *& Pasture Science* **69**, 574-586.
- 656 **McMaster GS, Edmunds DA, Wilhelm WW, Nielsen DC, Prasad PVV, Ascough JC.** 2011. PhenologyMMS: A  
657 program to simulate crop phenological responses to water stress. *Computers and Electronics in Agriculture* **77**,  
658 118-125.
- 659 **Moffat CS, Ingle RA, Wathugala DL, Saunders NJ, Knight H, Knight MR.** 2012. ERF5 and ERF6 Play  
660 Redundant Roles as Positive Regulators of JA/Et-Mediated Defense against *Botrytis cinerea* in Arabidopsis. *Plos*  
661 *One* **7**, e35995.
- 662 **Muller M, Munne-Bosch S.** 2015. Ethylene Response Factors: A Key Regulatory Hub in Hormone and Stress  
663 Signaling. *Plant Physiology* **169**, 32-41.
- 664 **Nielsen R, Williamson S, Kim Y, Hubisz MJ, Clark AG, Bustamante C.** 2005. Genomic scans for selective  
665 sweeps using SNP data. *Genome Research* **15**, 1566-1575.
- 666 **Niklas KJ.** 1994. *Plant allometry: the scaling of form and process*. Chicago: University of Chicago Press.
- 667 **Niwa M, Daimon Y, Kurotani K, Higo A, Pruneda-Paz JL, Breton G, Mitsuda N, Kay SA, Ohme-Takagi M,**  
668 **Endo M, Araki T.** 2013. BRANCHED1 Interacts with FLOWERING LOCUS T to Repress the Floral Transition of  
669 the Axillary Meristems in Arabidopsis. *The Plant Cell* **25**, 1228-1242.
- 670 **Otegui ME, Cirilo AG, Uhart SA, Andrade FH.** 2021. Maize. In: Sadras VO, Calderini DF, eds. *Crop*  
671 *Physiology: Case studies in major crops*: Academic Press.
- 672 **Parmesan C.** 2006. Ecological and Evolutionary Responses to Recent Climate Change. *Annual Review of*  
673 *Ecology, Evolution, and Systematics* **37**, 637-669.
- 674 **Patrick JW, Stoddard FL.** 2010. Physiology of flowering and grain filling in faba bean. *Field Crops Research*  
675 **115**, 234-242.
- 676 **Pinhasi Van-Oss R, Sherman A, Zhang H-B, Vandemark G, Coyne C, Abbo S.** 2016. Vernalization response  
677 of domesticated × wild chickpea progeny is subject to strong genotype by environment interaction. *Plant*  
678 *Breeding* **135**, 102-110.
- 679 **Rebetzke GJ, Fischer RA, van Herwaarden AF, Bonnett DG, Chenu K, Rattey AR, Fettell NA.** 2014. Plot  
680 size matters: interference from intergenotypic competition in plant phenotyping studies. *Functional Plant Biology*  
681 **41**, 107-118.
- 682 **Richardson AD, Keenan TF, Migliavacca M, Ryu Y, Sonnentag O, Toomey M.** 2013. Climate change,  
683 phenology, and phenological control of vegetation feedbacks to the climate system. *Agricultural and Forest*  
684 *Meteorology* **169**, 156-173.
- 685 **Rodriguez D, Sadras VO.** 2007. The limit to wheat water use efficiency in eastern Australia. I. Gradients in the  
686 radiation environment and atmospheric demand. *Australian Journal of Agricultural Research* **58**, 287-302.
- 687 **Sadras VO, Lake L, Li Y, Farquharson EA, Sutton T.** 2016. Phenotypic plasticity and its genetic regulation for  
688 yield, nitrogen fixation and  $\delta^{13}C$  in chickpea crops under varying water regimes. *Journal of Experimental Botany*  
689 **67**, 4339-4351.
- 690 **Sadras VO, Rodriguez D.** 2007. The limit to wheat water use efficiency in eastern Australia. II. Influence of  
691 rainfall patterns. *Australian Journal of Agricultural Research* **58**, 657-669.
- 692 **Schwinning S, Ehleringer JR.** 2001. Water-use trade-offs and optimal adaptations to pulse-driven arid  
693 ecosystems. *Journal of Ecology* **89**, 464-480.

- 694 **Singh P.** 1991. Influence of water-deficits on phenology, growth and dry-matter allocation in chickpea (*Cicer*  
695 *arietinum*). *Field Crops Research* **28**, 1-15.
- 696 **Summerfield RJ, Roberts EH, Erskine W, Ellis RH.** 1985. Effects of temperature and photoperiod on flowering  
697 in lentils (*Lens culinaris* Medic.). *Annals of Botany* **56**, 659-671.
- 698 **Tardieu F.** 2012. Any trait or trait-related allele can confer drought tolerance: just design the right drought  
699 scenario. *Journal of Experimental Botany* **63**, 25-31.
- 700 **Thomas, Robertson MJ, Fukai S, Peoples MB.** 2004. The effect of timing and severity of water deficit on  
701 growth, development, yield accumulation and nitrogen fixation of mungbean. *Field Crops Research* **86**, 67-80.
- 702 **Van Bocxlaer B.** 2017. Hierarchical structure of ecological and non-ecological processes of differentiation  
703 shaped ongoing gastropod radiation in the Malawi Basin. *Proceedings of the Royal Society B: Biological*  
704 *Sciences* **284**, 20171494.
- 705 **Wallach D, Palosuo T, Thorburn P, Hochman Z, Andrianasolo F, Asseng S, Basso B, Buis S, Crout N,**  
706 **Dumont B, Ferrise R, Gaiser T, Gayler S, Hiremath S, Hoek S, Horan H, Hoogenboom G, Huang M,**  
707 **Jabloun M, Jansson P-E, Jing Q, Justes E, Kersebaum KC, Launay M, Lewan E, Luo Q, Maestrini B,**  
708 **Moriondo M, Olesen JE, Padovan G, Poyda A, Priesack E, Pullens JWM, Qian B, Schütze N, Shelia V,**  
709 **Souissi A, Specka X, Kumar Srivastava A, Stella T, Streck T, Trombi G, Wallor E, Wang J, Weber TKD,**  
710 **Weihermüller L, de Wit A, Wöhling T, Xiao L, Zhao C, Zhu Y, Seidel SJ.** 2021. Multi-model evaluation of  
711 phenology prediction for wheat in Australia. *Agricultural and Forest Meteorology* **298-299**, 108289.
- 712 **Wasserstein RL, Schirm AL, Lazar NA.** 2019. Moving to a World Beyond “ $p < 0.05$ ”. *The American Statistician*  
713 **73**, 1-19.
- 714 **Wright S.** 1950. Genetical Structure of Populations. *Nature* **166**, 247-249.
- 715 **Xu X, Liu X, Ge S, Jensen JD, Hu F, Li X, Dong Y, Gutenkunst RN, Fang L, Huang L, Li J, He W, Zhang G,**  
716 **Zheng X, Zhang F, Li Y, Yu C, Kristiansen K, Zhang X, Wang J, Wright M, McCouch S, Nielsen R, Wang J,**  
717 **Wang W.** 2012. Resequencing 50 accessions of cultivated and wild rice yields markers for identifying  
718 agronomically important genes. *Nature Biotechnology* **30**, 105-U157.
- 719 **Yoshida N, Yanai Y, Chen LJ, Kato Y, Hiratsuka J, Miwa T, Sung ZR, Takahashi S.** 2001. EMBRYONIC  
720 FLOWER2, a novel polycomb group protein homolog, mediates shoot development and flowering in Arabidopsis.  
721 *The Plant Cell* **13**, 2471-2481.
- 722 **Yousfi N, Saïdi I, Slama I, Abdelly C.** 2015. Phenology, leaf gas exchange, growth and seed yield in *Medicago*  
723 *polymorpha* L. populations affected by water deficit and subsequent recovery. *Flora - Morphology, Distribution,*  
724 *Functional Ecology of Plants* **214**, 50-60.
- 725 **Zheng B, Biddulph B, Li D, Kuchel H, Chapman S.** 2013. Quantification of the effects of VRN1 and Ppd-D1 to  
726 predict spring wheat (*Triticum aestivum*) heading time across diverse environments. *Journal of Experimental*  
727 *Botany* **64**, 3747–3761.

728

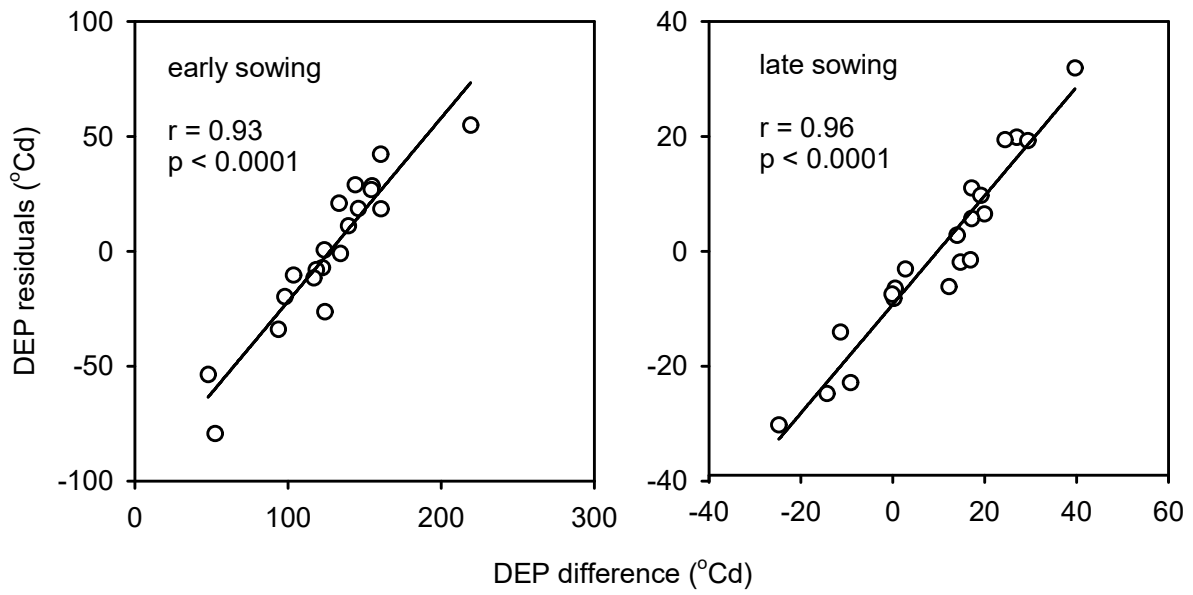

Supplementary Figure 1. Comparison of drought effect on phenology (*DEP*) calculated with difference- and residual-based approaches.

729

730

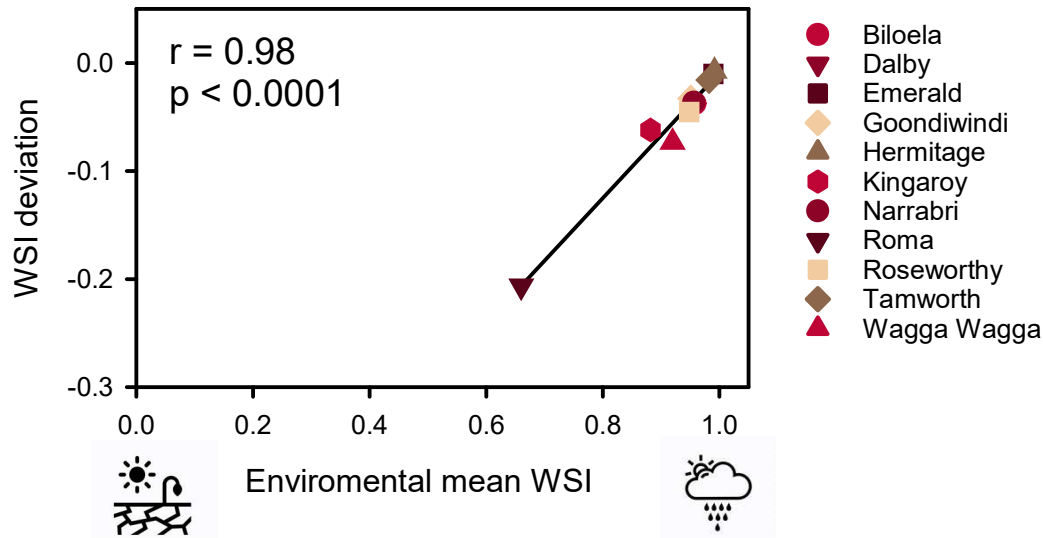

731

Supplementary Figure 2. *WSI* deviation from the  $y = x$  line in Figure 7a as a function of environmental mean *WSI*, representing the average water stress index in the critical period for each location, averaged across other factors (65 years, 5 sowing dates, 2 initial soil waters, 2 genotypes). The *WSI* ranges from 1 (no stress) to 0 (no growth). The line is the least squares regression.



732 Supplementary Table 1. Genetic parameters to model phenological development of chickpea.  
733 Parameters are based on measurements and calibrations with PBA Boundary<sup>Φ</sup>, a locally adapted,  
734 widely used cultivar in commercial crops.

735

| Parameter                  | Description                                | Unit | Value or Range |
|----------------------------|--------------------------------------------|------|----------------|
| tt_emerg_to_endjuv         | TT from emergence to end of juvenile phase | °Cd  | 650            |
| cum_vernal_days            | cumulative vernal days                     | d    | 0 to 100       |
| est_days_emerg_to_init     | Days from emergence to floral initiation   | d    | 83             |
| x_pp_endjuv_to_init        | Photoperiod                                | h    | 10.7 to 17.0   |
| y_tt_endjuv_to_init        | TT from end juvenile to floral initiation  | °Cd  | 446            |
| x_pp_init_to_flower        | Photoperiod                                | h    | 1 to 24        |
| y_tt_init_to_flower        | TT from initiation to flowering            | °Cd  | 33             |
| x_pp_flower_to_start_grain | Photoperiod                                | h    | 1 to 24        |
| y_tt_flower_to_start_grain | TT from flowering to start grain fill      | °Cd  | 450            |
| x_pp_start_to_end_grain    | Photoperiod                                | h    | 1 to 24        |
| y_tt_start_to_end_grain    | TT from start grain fill to end grain fill | °Cd  | 690            |
| tt_end_grain_to_maturity   | TT from end grain fill to maturity         | °Cd  | 60             |

736

737

738

739

740

Supplementary Table 2. Analysis of variance of thermal time from sowing to flowering, carbon isotope composition  $\delta^{13}\text{C}$ , and seed weight.

741

| Source of variation                      | Df | Thermal time to   |           |                       |           |                   |           |
|------------------------------------------|----|-------------------|-----------|-----------------------|-----------|-------------------|-----------|
|                                          |    | flowering         |           | $\delta^{13}\text{C}$ |           | Seed weight       |           |
|                                          |    | Wald<br>statistic | Pr(Chisq) | Wald<br>statistic     | Pr(Chisq) | Wald<br>statistic | Pr(Chisq) |
| Intercept                                | 1  | 577198.6          | < 2.2E-16 | 333960.9              | < 2.2E-16 | 109674.2          | < 2.2E-16 |
| Season                                   | 1  | 1176.3            | < 2.2E-16 | 76.0                  | < 2.2E-16 | 0.6               | 0.43      |
| Sowing time                              | 1  | 6684.2            | < 2.2E-16 | 459.5                 | < 2.2E-16 | 24.1              | 9.08E-07  |
| Water regime                             | 1  | 228.3             | < 2.2E-16 | 47.6                  | 5.19E-12  | 25.4              | 4.70E-07  |
| Genotype                                 | 19 | 3354.7            | < 2.2E-16 | 115.7                 | 6.66E-16  | 20406.5           | < 2.2E-16 |
| Season:Sowing time                       | 1  | 89.8              | < 2.2E-16 | 0.0                   | 0.92      | 2.1               | 0.15      |
| Season:Water regime                      | 1  | 1.7               | 0.19      | 4.2                   | 0.04      | 9.3               | 0.002348  |
| Sowing time:Water regime                 | 1  | 84.3              | < 2.2E-16 | 3.5                   | 0.06      | 4.8               | 0.028273  |
| Season:Genotype                          | 19 | 106.4             | 3.71E-14  | 17.1                  | 0.58      | 140.5             | < 2.2E-16 |
| Sowing time:Genotype                     | 19 | 137.6             | < 2.2E-16 | 15.0                  | 0.72      | 30.2              | 0.049     |
| Water regime:Genotype                    | 19 | 165.2             | < 2.2E-16 | 44.0                  | 0.00094   | 77.5              | 4.93E-09  |
| Season:Sowing time:Water regime          | 1  | 6.7               | 0.0099    | 0.7                   | 0.41      | 2.5               | 0.11      |
| Season:Sowing time:Genotype              | 19 | 77.5              | 4.93E-09  | 25.4                  | 0.15      | 58.1              | 7.74E-06  |
| Season:Water regime:Genotype             | 19 | 48.2              | 0.00024   | 20.5                  | 0.37      | 59.8              | 4.12E-06  |
| Sowing time:Water regime:Genotype        | 19 | 104.9             | 6.91E-14  | 25.5                  | 0.14      | 19.8              | 0.41      |
| Season:Sowing time:Water regime:Genotype | 19 | 24.4              | 0.18      | 22.2                  | 0.27      | 24.2              | 0.19      |
| Residual (MS)                            | NA | NA                | NA        | NA                    | NA        | NA                | NA        |

742

743

744

Supplementary Table 3. Analysis of variance of drought effect on phenology.

| Source of variation         | Df | Wald statistic | Pr(Chisq) |
|-----------------------------|----|----------------|-----------|
| Intercept                   | 1  | 386.9          | < 2.2E-16 |
| Season                      | 1  | 72.3           | < 2.2E-16 |
| Sowing date                 | 1  | 117.0          | < 2.2E-16 |
| Genotype                    | 19 | 91.4           | 1.87E-11  |
| Season:Sowing date          | 1  | 0.2            | 0.63      |
| Season:Genotype             | 19 | 43.7           | 0.0010    |
| Sowing date:Genotype        | 19 | 88.0           | 7.50E-11  |
| Season:Sowing date:Genotype | 18 | 28.2           | 0.059     |
| Residual (MS)               | NA | NA             | NA        |

Supplementary Table 4. Genes located within 250kb of the genomic regions under selection (top 0.1%  $F_{ST}$ ) for *DEP*. See attached Excel file.

Supplementary Table 5. Summary statistics of frequency distributions of flowering time, water stress index and temperature for responsive and unresponsive genotypes. Histograms are in Figure 6.

| Variable                           | Parameter  | Responsive | Unresponsive |
|------------------------------------|------------|------------|--------------|
| Time to flowering<br>(d)           | Mean       | 73         | 89           |
|                                    | Std. Dev.  | 11.5       | 17.5         |
|                                    | Minimum    | 47         | 55           |
|                                    | Maximum    | 110        | 148          |
|                                    | Coef. Var. | 0.16       | 0.20         |
|                                    | Skewness   | 0.26       | 0.66         |
|                                    | Kurtosis   | -0.18      | -0.02        |
|                                    | Median     | 73         | 87           |
| Thermal time to flowering<br>(°Cd) | Mean       | 878        | 1105         |
|                                    | Std. Dev.  | 48.5       | 110.5        |
|                                    | Minimum    | 822        | 846          |
|                                    | Maximum    | 1051       | 1585         |
|                                    | Coef. Var. | 0.06       | 0.10         |
|                                    | Skewness   | 1.29       | 0.43         |
|                                    | Kurtosis   | 0.43       | 0.04         |
|                                    | Median     | 856        | 1095         |
| Water stress index<br>(unitless)   | Mean       | 0.978      | 0.927        |
|                                    | Std. Dev.  | 0.065      | 0.127        |
|                                    | Minimum    | 0.377      | 0.293        |
|                                    | Maximum    | 1          | 1            |
|                                    | Coef. Var. | 0.067      | 0.137        |
|                                    | Skewness   | -4.27      | -2.23        |
|                                    | Kurtosis   | 21.31      | 4.77         |
|                                    | Median     | 1          | 0.993        |
| Maximum temperature<br>(°C)        | Mean       | 22.3       | 24.2         |
|                                    | Std. Dev.  | 3.2        | 2.9          |
|                                    | Minimum    | 14.2       | 16.1         |
|                                    | Maximum    | 31.7       | 33.5         |
|                                    | Coef. Var. | 0.14       | 0.12         |
|                                    | Skewness   | 0.03       | 0.17         |
|                                    | Kurtosis   | -0.43      | -0.30        |
|                                    | Median     | 22.3       | 24.1         |
| Minimum temperature<br>(°C)        | Mean       | 7.1        | 8.7          |
|                                    | Std. Dev.  | 2.4        | 2.4          |
|                                    | Minimum    | -0.1       | 1.5          |
|                                    | Maximum    | 16.0       | 16.6         |
|                                    | Coef. Var. | 0.34       | 0.28         |
|                                    | Skewness   | 0.22       | 0.16         |
|                                    | Kurtosis   | -0.21      | -0.17        |
|                                    | Median     | 7.0        | 8.7          |
| Mean temperature<br>(°C)           | Mean       | 14.7       | 16.4         |
|                                    | Std. Dev.  | 2.50       | 2.35         |
|                                    | Minimum    | 8.9        | 10.8         |
|                                    | Maximum    | 22.7       | 24.3         |
|                                    | Coef. Var. | 0.17       | 0.14         |
|                                    | Skewness   | 0.28       | 0.34         |
|                                    | Kurtosis   | -0.48      | -0.35        |
|                                    | Median     | 14.6       | 16.3         |
